# Supplementary material for: Nutritional status, symptom burden, and predictive validity of the Pt-Global web tool/PG-SGA in CKD patients: A hospital based cross sectional study
Source: PLOS Glob Public Health. 2023 Jan 17;3(1):e0001301. doi: 10.1371/journal.pgph.0001301 (PMC10022301; doi:10.1371/journal.pgph.0001301)
Supplement: S1 Data — (XLSX) [file pgph.0001301.s001.xlsx]

## Sheet: Sheet1
	Demographics														Disease and Co-morbidities					Medications Prescribed
S.No	Age	Age group	SBP	DBP	Gender	Weight	Height (cm)	Height (m)	BMI	BMI	Residence	Smoking	Alcohol	Socio-economic Status	Diagnosis	Diabetic CKD	Co-morbidities	No of Co-morbidities	Charlson CMI	Telmisartan	Olmesartan	ARBs	Ramipril (ACE-I)	Prazosin (Alpha-B)	Amlodipine	Clinidipine	CCBs	Insulin	Metformin	Glemipride	Gilcilaizide	Tenegliptin	OHA	Atorvastatin	Diuretics (Furoemide)	Nodosin	Iron Supp	Calcium	Vit D3	Glyceryltrinitrate	Ecosprin	Metoprolol	Febuxstat	Allopurinol	Urate Drugs	Sevalamer	Predinosolone	Thyroxine	No. of Medications
1	48	1	90	60	1	58	167	1.67	20.7967	2	0	0	0	2	CKD	1	DM, HTN	2	1	1	0	1	0	1	0	1	1	0	0	0	0	1	1	0	0	0	1	1	1	0	1	0	0	0	0	0	0	0	8
2	63	2	160	74	0	60	157	1.57	24.3417	2	1	0	0	3	CKD	1	T2DM, HTN, CAD	3	1	0	0	0	1	0	0	0	0	0	1	0	0	0	1	0	0	0	0	1	1	1	1	0	0	0	0	0	0	0	6
3	54	1	150	80	1	63	170	1.7	21.7993	2	1	0	1	2	CKD	1	HTN, DM	2	1	0	0	0	0	0	0	0	0	0	0	0	0	1	1	1	0	0	1	1	1	0	0	0	0	0	0	0	0	0	5
4	73	2	100	70	1	82	167	1.67	29.4022	3	1	0	1	1	CKD	0	HTN, CAD	2	1	1	0	1	0	0	0	0	0	0	0	0	0	0	0	0	1	1	1	1	0	0	0	0	0	0	0	0	0	0	5
5	54	1	96	60	1	64	170	1.7	22.1453	2	1	0	0	2	CKD	1	T2DM, HTN	2	1	0	0	0	0	0	1	0	1	1	0	0	0	0	0	0	0	0	1	1	1	0	0	0	0	0	0	0	0	0	5
6	67	2	144	70	0	76	160	1.6	29.6875	3	1	0	0	3	CKD	1	T2DM, HTN	2	1	1	0	1	0	0	0	0	0	1	0	0	0	0	0	0	0	0	1	1	0	0	0	0	0	0	0	0	0	0	4
7	57	1	170	95	1	69	167	1.67	24.7409	2	0	0	1	3	CKD	0	HTN	1	0	1	0	1	0	0	0	0	0	0	0	0	0	0	0	0	0	0	1	1	1	0	0	0	0	0	0	0	0	0	4
8	42	1	160	90	0	70	157	1.57	28.3987	3	1	0	0	2	CKD	1	T2DM, HTN, HYPOTHYROIDISM	3	1	0	1	1	0	0	1	0	1	1	0	0	0	1	1	0	1	1	1	1	1	0	0	0	0	0	0	0	0	0	9
9	72	2	121	83	1	56	157	1.57	22.7189	2	0	0	0	3	CKD	1	T2DM, CAD, HTN	3	1	0	0	0	0	1	0	0	0	0	0	1	0	1	1	0	0	0	1	0	1	1	1	1	0	0	0	0	0	0	7
10	51	1	184	122	1	83	170	1.7	28.7197	3	0	1	1	3	CKD	0	HTN,PROSTAT	2	1	0	0	0	0	0	1	0	1	0	0	0	0	0	0	0	1	0	1	0	1	0	0	0	0	0	0	0	0	0	4
11	40	1	148	96	1	54	160	1.6	21.0937	2	0	0	0	3	CKD	1	T2DM, HTN	2	1	1	0	1	0	0	0	0	0	0	0	0	0	0	0	0	1	0	1	1	1	0	0	0	0	0	0	0	0	0	5
12	69	2	124	72	0	48	150	1.5	21.3333	2	1	0	0	2	CKD	0	HTN	1	0	1	0	1	0	0	1	0	1	0	0	0	0	0	0	0	0	0	1	1	1	0	0	0	0	0	0	0	0	0	5
13	58	1	124	80	1	65	173	1.73	21.718	2	1	1	1	2	CKD	0	HTN	1	1	1	0	1	0	0	1	0	1	0	0	0	0	0	0	0	0	0	1	1	0	0	0	0	0	0	0	0	0	0	4
14	50	1	130	80	1	62	170	1.7	21.4533	2	0	0	1	3	CKD	1	T2DM, HTN	2	1	0	0	0	0	0	0	0	0	0	0	0	0	1	1	1	1	1	1	1	1	0	0	0	0	0	0	0	0	0	7
15	54	1	148	88	0	70	157	1.57	28.3987	3	1	0	0	2	CKD	1	T2DM, HYPOTHYROIDISM	2	1	0	0	0	0	0	0	0	0	1	0	0	0	1	1	0	0	0	1	1	1	0	1	0	0	0	0	0	0	1	7
16	63	2	120	84	1	82	170	1.7	28.3737	3	1	0	1	2	CKD	0	HTN	1	0	0	0	0	0	0	0	0	0	0	0	0	0	0	0	0	1	0	1	0	0	0	0	0	1	0	1	0	0	0	3
17	42	1	167	95	1	71	165	1.65	26.0789	3	0	1	1	2	CKD	1	T2DM, RETINOPATHY, PROSTATOMEGALY, HTN, NEPHROPATHY	5	2	0	0	0	0	0	0	0	0	1	0	1	0	0	1	0	1	1	1	1	1	0	0	0	0	0	0	0	0	0	7
18	70	2	146	70	1	78	165	1.65	28.6501	3	0	1	1	3	CKD	1	T2DM, HTN	2	1	1	0	1	0	0	0	0	0	1	0	0	0	0	0	0	0	0	1	1	1	0	0	0	0	0	0	0	0	0	5
19	84	2	148	92	1	72	172	1.72	24.3375	2	0	0	1	2	CKD	1	T2DM, HTN, UTI	3	1	0	0	0	0	0	0	0	0	1	0	0	0	0	0	0	0	1	1	1	0	0	1	0	0	0	0	0	0	0	5
20	58	1	118	85	0	70	158	1.58	28.0403	3	1	0	0	3	CKD	0	HTN, CAD	2	0	1	0	1	0	0	0	0	0	0	0	0	0	0	0	0	0	0	1	1	0	0	1	1	0	0	0	0	0	0	5
21	51	1	132	78	0	60	154	1.54	25.2993	3	1	0	0	3	CKD	1	T2DM, HTN	2	1	1	0	1	0	0	1	0	1	1	0	0	0	0	0	0	1	1	1	1	1	0	0	0	0	0	0	0	0	0	8
22	31	1	132	92	0	65	157	1.57	26.3702	3	1	0	0	3	CKD	0	HTN	1	0	1	0	1	0	0	0	0	0	0	0	0	0	0	0	0	1	0	1	1	1	0	0	0	0	0	0	0	0	0	5
23	48	1	182	99	1	86	178	1.78	27.143	3	1	0	1	3	CKD	1	T2DM, RETINOPATHY, HTN	3	2	1	0	1	0	0	0	0	0	1	0	0	0	0	0	0	1	1	1	1	1	0	1	0	0	0	0	0	0	0	8
24	55	1	160	100	0	52	157	1.57	21.0962	2	1	0	0	3	CKD	1	T2DM, HTN	2	1	0	0	0	0	0	1	0	1	0	0	0	0	0	0	0	1	1	1	1	1	0	0	0	0	0	0	0	0	0	6
25	52	1	142	85	0	51	155	1.55	21.2279	2	0	0	0	3	CKD	0	HTN	1	0	0	0	0	0	0	1	0	1	0	0	0	0	0	0	0	1	0	0	1	0	0	0	0	0	0	0	0	0	0	3
26	67	2	112	70	1	77	168	1.68	27.2817	3	0	0	1	2	CKD	0	CAD, HTN	2	1	1	0	1	0	0	0	0	0	0	0	0	0	0	0	0	1	0	1	1	0	0	0	0	1	0	1	0	0	0	5
27	37	1	148	70	0	102	160	1.6	39.8437	4	1	0	1	2	CKD	0	HTN	1	0	1	0	1	0	0	0	0	0	0	0	0	0	0	0	0	0	0	0	1	1	0	0	0	0	0	0	0	0	0	3
28	53.7	1	150	88	1	43	153	1.53	18.369	1	1	0	1	2	CKD	0	HTN	1	0	0	0	0	0	0	0	0	0	0	0	0	0	0	0	0	0	0	0	0	0	0	0	0	0	0	0	0	0	0	0
29	23	1	185	83	0	43	153	1.53	18.369	1	1	0	1	2	CKD	0	HTN	1	0	1	0	1	0	0	0	0	0	0	0	0	0	0	0	0	1	0	1	1	1	0	0	0	0	0	0	0	0	0	5
30	69	2	148	85	1	75	167	1.67	26.8923	3	1	0	1	2	CKD	1	T2DM, HTN	2	1	0	0	0	0	0	1	0	1	0	1	0	0	0	1	0	0	0	0	0	0	0	1	0	0	0	0	0	0	0	3
31	63	1	160	105	0	64	148	1.48	29.2184	3	1	0	0	3	CKD	1	T2DM, HTN	2	1	0	0	0	0	0	1	0	1	1	0	0	0	0	0	0	0	0	1	1	1	0	0	0	0	0	0	0	0	0	5
32	56	1	142	84	0	58	163	1.63	21.8299	2	1	0	0	2	CKD	1	T2DM, SLE, HYPOTHYROIDISM	3	1	0	0	0	0	0	0	0	0	0	0	0	0	1	1	0	0	0	1	1	0	0	0	0	0	0	0	0	0	0	3
33	54	1	174	88	0	66	150	1.5	29.3333	3	1	0	0	3	CKD	1	T2DM, HTN	2	1	0	0	0	0	1	0	0	0	0	0	0	0	0	0	0	0	0	1	0	1	0	0	0	0	0	0	1	0	0	4
34	37	1	142	80	0	71	148	1.48	32.4141	4	0	0	0	3	CKD	0	HTN, SEIZURES	2	1	0	0	0	0	0	1	0	1	0	0	0	0	0	0	0	1	0	1	1	1	0	0	0	0	0	0	0	0	0	5
35	42	1	116	79	0	56	154	1.54	23.6127	2	0	0	0	3	CKD	0	HTN	1	1	0	0	0	0	0	1	0	1	0	0	0	0	0	0	0	1	1	0	1	1	0	0	0	0	0	0	0	0	0	5
36	68	2	140	70	1	72	172	1.72	24.3375	3	0	0	1	3	CKD	1	T2DM, HTN	2	1	0	0	0	0	0	1	0	1	1	0	0	0	0	0	0	0	1	1	1	1	0	0	0	0	0	0	0	0	0	6
37	68	2	120	80	0	49	155	1.55	20.3954	2	0	0	0	2	CKD	1	T2DM, CKD	2	1	0	0	0	0	0	1	0	1	0	0	0	0	1	1	0	0	1	1	1	1	0	1	0	0	0	0	0	0	0	7
38	77	2	100	60	1	63	162	1.62	24.0055	2	1	0	0	3	CKD	0	HTN, PVD	2	1	1	0	1	0	0	0	0	0	0	0	0	0	0	0	1	0	0	0	1	1	0	0	0	0	0	0	0	0	0	4
39	51	1	120	70	0	59	150	1.5	26.2222	3	1	0	0	3	CKD	0	HTN	1	0	0	0	0	0	0	1	0	1	0	0	0	0	0	0	0	0	0	1	1	1	0	0	0	0	0	0	0	0	0	4
40	69	2	170	86	0	59	154	1.54	24.8777	2	1	0	0	3	CKD	1	T2DM, HTN, NEPHROPATHY, ANEMIA	4	2	0	0	0	0	0	1	0	1	0	0	1	0	0	1	0	0	0	1	1	1	0	0	0	0	0	0	0	0	0	5
41	29	1	144	82	1	66	175	1.75	21.551	2	0	0	1	2	CKD	0	IgA NEPHROPATHY, HTN	2	1	0	0	0	1	0	0	0	0	0	0	0	0	0	0	1	0	0	0	1	0	0	0	0	0	0	0	0	1	0	4
42	50	1	200	105	0	52	153	1.53	22.2137	2	0	0	0	2	CKD	1	T2DM, HTN	2	1	1	0	1	0	0	0	0	0	0	0	0	0	0	0	0	1	0	1	0	1	0	0	0	0	0	0	1	0	0	5
43	58	1	120	58	0	40	157	1.57	16.2278	1	1	0	0	3	CKD	1	T2DM, CAD, HTN	3	1	0	0	0	0	0	0	0	0	1	0	0	0	0	0	0	1	1	0	0	1	0	1	0	0	0	0	1	0	0	6
44	70	2	130	70	1	67	175	1.75	21.8775	2	0	1	1	3	CKD	0	CAD, HTN	2	0	0	0	0	0	0	0	0	0	0	0	0	0	0	0	0	1	0	1	1	1	0	1	0	0	0	0	0	0	0	5
45	45	1	136	98	0	46	153	1.53	19.6505	2	0	0	0	3	CKD	0	ADPKD, HTN	2	0	0	0	0	0	0	0	0	0	0	0	0	0	0	0	0	0	0	1	1	1	0	0	0	0	0	0	0	0	0	3
46	60	2	174	107	0	53	160	1.6	20.7031	2	0	0	0	2	CKD	0	HTN	1	0	0	0	0	0	1	1	0	1	0	0	0	0	0	0	0	1	0	0	0	1	0	0	0	0	0	0	1	0	0	5
47	61	2	156	90	1	65	160	1.6	25.3906	3	0	1	0	3	CKD	1	HTN, T2DM	1	1	0	0	0	0	0	1	0	1	1	0	0	0	0	0	0	1	1	1	1	1	0	0	0	0	0	0	0	0	0	7
48	57	1	136	110	1	82	174	1.74	27.0841	3	1	0	1	2	CKD	1	HTN, T2DM	1	1	1	0	1	0	0	0	0	0	0	0	0	0	0	0	0	1	0	1	1	1	0	0	0	0	0	0	0	0	0	5
49	66	2	167	95	1	90	165	1.65	33.0578	4	0	0	1	2	CKD	1	T2DM,HTN,CAD	3	1	0	0	0	0	1	0	0	0	1	0	0	0	1	1	0	1	1	1	1	1	0	0	0	0	0	0	0	0	0	8
50	60	2	128	67	1	78	183	1.83	23.2912	2	1	0	1	2	CKD	1	T2DM, HTN	2	1	0	0	0	0	1	0	0	0	0	0	0	0	0	0	0	1	0	0	1	1	0	0	0	0	0	0	0	0	0	4
51	60	2	154	76	0	54	150	1.5	24	2	1	0	0	2	CKD	1	T2DM,HTN	2	1	1	0	1	0	1	0	0	0	1	0	0	0	1	1	0	1	0	1	1	1	0	1	0	0	0	0	0	0	0	9
52	50	1	127	80	1	63	170	1.7	21.7993	2	0	0	1	3	CKD	1	T2DM,HTN	2	1	0	0	0	0	1	1	0	1	0	0	0	1	0	1	0	1	1	1	1	1	0	0	0	0	0	0	0	0	0	8
53	81	2	120	77	1	68	172	1.72	22.9854	2	0	1	1	3	CKD	1	T2DM,HTN	2	1	0	0	0	0	0	1	0	1	0	0	0	0	0	0	0	1	0	1	1	1	0	0	0	0	0	0	0	0	0	5
54	49	1	153	81	1	72	165	1.65	26.4463	3	1	1	1	2	CKD	1	T2DM,DIABETIIC NEPHROPATHY, HTN,CAD	4	2	0	0	0	0	0	1	0	1	0	0	0	1	1	1	0	1	0	1	1	1	0	1	0	0	0	0	0	0	0	7
55	54	1	109	76	1	60	167	1.67	21.5138	2	0	1	1	3	CKD	1	T2DM, HTN	2	1	0	0	0	0	0	0	0	0	0	0	0	1	0	1	1	1	1	0	1	1	0	0	0	0	0	0	0	0	0	6
56	50	1	140	80	0	52	159	1.59	20.5688	2	1	0	0	2	CKD	1	T2DM,HTN,CAD	3	1	0	0	0	0	0	1	0	1	1	0	0	0	0	0	0	0	1	1	1	1	0	1	0	0	0	0	0	0	0	7
57	49	1	160	80	1	63	165	1.65	23.1405	2	0	1	1	3	CKD	0	HTN	1	0	0	0	0	0	0	1	0	1	0	0	0	0	0	0	0	1	1	0	1	1	0	0	0	0	0	0	0	0	0	5
58	54	1	142	90	1	69	173	1.73	23.0545	2	0	0	0	2	CKD	1	DM, HTN	2	1	0	0	0	0	0	0	0	0	1	0	0	0	0	0	0	0	1	1	1	1	0	0	0	0	0	0	0	0	0	5
59	66	2	160	95	1	73	178	1.78	23.04	2	0	0	1	3	CKD	1	T2DM,HTN	2	1	0	0	0	0	0	0	0	0	1	0	0	0	0	0	0	1	0	1	1	1	0	0	0	0	0	0	0	0	0	5
60	61	2	136	73	0	62	157	1.57	25.1531	3	1	0	0	2	CKD	1	T2DM, HTN	2	1	1	0	1	0	0	1	0	1	1	0	0	0	0	0	0	0	0	0	1	1	0	0	0	0	0	0	0	0	0	5
61	55	1	158	82	1	100	180	1.8	30.8642	4	1	0	1	3	CKD	1	Diabetic nephropathy, HTN	2	2	0	0	0	0	0	0	0	0	1	0	0	0	0	0	0	1	0	1	0	1	0	0	0	0	0	0	0	0	0	4
62	53	1	110	70	1	63	168	1.68	22.3214	2	1	0	1	2	CKD	1	T2dm, Diabetic retinopathy	2	2	0	0	0	0	0	0	0	0	0	0	0	0	0	0	0	1	1	1	0	1	0	1	0	0	0	0	1	0	0	6
63	64	1	165	92	1	59	170	1.7	20.4152	2	1	1	1	2	CKD	0	HTN, Hyperthyroidism	2	0	0	0	0	0	0	0	0	0	0	0	0	0	0	0	0	0	0	1	1	1	0	0	0	0	0	0	0	0	1	4
64	40	1	140	100	0	60	157	1.57	24.3417	2	0	0	0	3	CKD	0	HTN, Hyperthyroidism	2	0	0	0	0	0	0	1	0	1	0	0	0	0	0	0	0	0	0	0	1	0	0	0	0	0	0	0	0	0	1	3
65	45	1	160	85	1	61	145	1.45	29.013	3	0	0	1	2	CKD	0	HTN	1	0	0	0	0	0	0	1	0	1	0	0	0	0	0	0	0	0	0	1	1	1	0	0	0	0	0	0	0	0	0	4
66	53	1	170	100	0	57	157	1.57	23.1246	3	0	0	0	2	CKD	1	HTN, T2DM, Diabetic Nephropathy, Diabetic Retinopathy	4	2	0	0	0	0	0	1	0	1	1	0	0	0	0	0	0	1	1	1	1	1	0	0	0	0	0	0	0	0	0	7
67	32	1	156	114	0	40	157	1.57	16.2278	2	0	0	0	3	CKD	0	HTN	1	0	0	0	0	0	0	1	0	1	0	0	0	0	0	0	0	1	0	1	1	1	0	0	0	0	0	0	0	0	0	5
68	62	2	104	60	0	52	153	1.53	22.2137	3	1	0	0	3	CKD	0	HTN	0	0	0	0	0	0	0	0	0	0	0	0	0	0	0	0	0	0	0	1	1	1	0	0	0	0	0	0	0	0	0	3
69	39	1	172	95	1	85	168	1.68	30.1162	4	0	1	1	3	CKD	0	HTN	1	0	0	0	0	0	1	1	0	1	0	0	0	0	0	0	0	1	0	1	1	1	0	0	0	0	0	0	0	0	0	6
70	75	2	159	105	1	69	172	1.72	23.3234	2	0	0	1	2	CKD	1	T2DM, HTN, CAD	3	1	0	0	0	0	0	1	0	1	1	0	0	0	0	0	0	1	0	1	1	1	0	0	0	0	0	0	0	0	0	6
71	67	2	113	74	1	63	166	1.66	22.8625	3	0	0	1	2	CKD	1	T2DM, CAD, HTN	3	1	0	0	0	0	0	0	0	0	1	0	0	0	0	0	0	1	1	1	1	1	0	1	0	1	0	1	0	0	0	8
72	61	2	122	84	1	73	170	1.7	25.2595	3	1	1	1	3	CKD	0	HTN	1	0	1	0	1	0	0	0	0	0	0	0	0	0	0	0	1	1	0	0	0	0	0	0	0	0	0	0	0	0	0	3
73	45	1	139	80	1	67	175	1.75	21.8775	2	1	1	1	3	CKD	1	T2DM, HTN, Diabetic Nephropathy, CAD, Pedal Edema	5	2	0	0	0	0	0	1	0	1	1	0	0	0	0	0	0	1	1	1	1	1	0	0	0	0	0	0	0	0	0	7
74	35	1	134	84	1	85	175	1.75	27.7551	3	0	0	1	3	CKD	1	T2DM, HTN	2	1	0	0	0	0	0	1	0	1	0	0	0	0	0	0	0	0	0	1	1	1	0	0	0	0	0	0	0	0	0	4
75	57	1	166	90	1	62	165	1.65	22.7732	2	0	0	1	3	CKD	1	T2DM, HTN, Hyperuricemia	3	1	1	0	1	0	0	0	0	0	1	0	0	0	0	0	0	0	0	1	1	1	0	0	0	0	0	0	0	0	0	5
76	68	2	186	92	1	64	173	1.73	21.3839	2	0	0	1	2	CKD	0	HTN	1	0	0	0	0	0	0	1	0	1	0	0	0	0	0	0	0	1	0	1	1	1	0	0	0	0	0	0	0	0	0	5
77	80	2	122	74	1	80	172	1.72	27.0416	3	1	0	0	2	CKD	0	HTN, CAD	2	0	1	0	1	0	0	1	0	1	0	0	0	0	0	0	0	0	0	1	1	1	0	1	0	0	0	0	0	0	0	6
78	61	2	157	84	0	55	150	1.5	24.4444	2	0	0	0	3	CKD	1	T2DM, HTN, CAD	3	1	0	0	0	0	0	0	0	0	1	0	0	0	0	0	0	1	1	1	1	1	0	1	0	0	0	0	0	0	0	7
79	71	2	130	79	1	75	168	1.68	26.5731	3	0	0	0	3	CKD	0	CAD, HTN	2	0	0	0	0	0	0	0	0	0	0	0	0	0	0	0	0	1	0	0	1	1	0	1	1	0	0	0	0	0	0	5
80	86	2	123	59	0	50	147	1.47	23.1385	2	1	0	0	2	CKD	0	HTN	1	0	0	0	0	0	0	0	0	0	0	0	0	0	0	0	0	1	1	1	1	1	0	0	0	0	0	0	0	0	0	5
81	63	2	127	69	1	95	170	1.7	32.8719	4	1	0	1	2	CKD	1	T2DM, HTN, ADPKD	3	1	0	0	0	0	0	1	0	1	1	0	0	0	0	0	0	0	1	1	1	1	0	0	1	0	0	0	0	0	0	7
82	20	1	122	85	0	55	164	1.64	20.4491	2	1	0	0	2	CKD	0	IgA NEPHROPATHY, HTN	2	0	0	0	0	1	0	0	0	0	0	0	0	0	0	0	0	0	1	1	1	1	0	0	0	0	0	0	0	0	0	5
83	53	1	135	82	0	75	157	1.57	30.4272	4	1	0	0	2	CKD	1	T2DM, HTN, SLE NEPHRITIS, HT	4	1	0	0	0	0	0	0	0	0	0	1	0	0	0	1	1	0	0	1	0	1	0	0	0	0	0	0	0	0	0	4
84	37	1	126	73	0	57	155	1.55	23.7253	2	1	0	0	2	CKD	0	HT, HTN	2	0	0	0	0	1	0	0	0	0	0	0	0	0	0	0	0	0	0	0	0	0	0	0	0	0	0	0	0	0	1	2
85	70	2	153	82	1	69	178	1.78	21.7775	2	1	0	1	2	CKD	1	T2DM, CAD, HTN	3	1	0	0	0	0	0	1	0	1	0	0	0	0	0	0	1	0	1	1	1	1	0	0	0	0	0	0	0	0	0	6
86	52	1	162	74	1	69	175	1.75	22.5306	2	0	0	1	3	CKD	1	T2DM, HTN	2	1	1	0	1	0	0	0	0	0	1	0	0	0	0	0	0	0	0	1	1	1	0	0	0	0	0	0	0	0	0	5
87	57	1	210	127	1	72	165	1.65	26.4463	3	1	1	1	3	CKD	0	ADPKD, HTN	2	0	1	0	1	0	0	1	0	1	0	0	0	0	0	0	0	0	0	1	1	1	0	0	0	0	0	0	0	0	0	5
88	69	2	147	80	0	48	157	1.57	19.4734	2	1	0	0	2	CKD	0	HTN, ANEMIA	2	0	0	0	0	0	0	0	0	0	0	0	0	0	0	0	0	0	1	1	0	1	0	0	0	0	0	0	1	0	0	4
89	60	2	126	74	1	82	185	1.85	23.9591	2	1	0	1	2	CKD	0	HTN	1	0	0	0	0	0	0	0	0	0	0	0	0	0	0	0	1	0	1	0	1	1	0	0	0	1	0	1	0	0	0	5
90	30	1	178	90	1	55	160	1.6	21.4844	2	0	0	0	3	CKD	0	HTN	1	0	0	0	0	0	1	1	0	1	0	0	0	0	0	0	0	1	0	1	0	1	0	0	0	0	0	0	1	0	0	6
91	50	1	170	90	0	65	160	1.6	25.3906	3	0	0	0	3	CKD	0	HTN	1	0	0	0	0	0	0	1	0	1	0	0	0	0	0	0	0	0	0	0	1	1	0	0	0	0	0	0	0	0	0	3
92	74	2	174	86	1	63	168	1.68	22.3214	2	0	0	1	2	CKD	1	T2DM, HTN	2	1	0	0	0	0	0	0	0	0	1	0	0	0	0	0	1	1	1	1	1	1	0	0	0	0	0	0	0	0	0	7
93	60	2	126	74	0	50	168	1.68	17.7154	1	0	0	0	2	CKD	0	HTN	1	0	1	0	1	0	0	0	0	0	0	0	0	0	0	0	0	1	0	1	1	1	0	0	0	0	0	0	0	0	0	5
94	73	2	196	78	1	50	168	1.68	17.7154	1	0	1	1	2	CKD	1	T2DM, HTN	2	1	0	0	0	0	0	1	0	1	0	0	0	0	0	0	0	0	1	1	1	1	0	0	0	0	0	0	0	0	0	5
95	66	2	180	80	0	45	140	1.4	22.9592	2	0	0	0	3	CKD	1	T2DM, ADPKD	2	1	1	0	1	0	0	0	0	0	0	0	0	0	1	1	1	0	1	1	1	1	0	0	0	0	0	0	0	0	0	7
96	32	1	121	81	1	65	180	1.8	20.0617	2	0	0	1	2	CKD	0	HTN	1	0	0	0	0	0	0	1	0	1	0	0	0	0	0	0	0	0	0	1	1	1	0	0	0	0	0	0	0	0	0	4
97	48	1	124	80	1	64	164	1.64	23.7953	2	1	0	0	3	CKD	0	HTN, ADPKD	2	0	1	0	1	0	0	1	0	1	0	0	0	0	0	0	1	0	0	1	1	1	0	0	0	0	0	0	0	0	0	6
98	60	2	152	102	1	97	181	1.81	29.6083	3	0	0	1	3	CKD	1	T2DM, HTN	2	1	0	0	0	0	0	1	0	1	1	0	0	0	0	0	0	0	0	1	1	1	0	0	0	0	0	0	0	0	0	5
99	60	2	150	88	1	64	164	1.64	23.7953	2	0	0	1	3	CKD	0	HTN	1	0	0	0	0	0	0	0	0	0	0	0	0	0	0	0	0	0	0	0	0	0	0	0	0	0	0	0	0	0	0	0
100	62	2	132	92	1	67	165	1.65	24.6097	2	0	1	0	3	CKD	0	ADPKD, HTN	2	0	0	0	0	0	0	0	0	0	0	0	0	0	0	0	0	0	1	1	1	1	0	0	0	0	0	0	0	0	0	4
101	68	2	141	90	1	85	183	1.83	25.3814	3	0	0	1	2	CKD	1	T2DM, HTN	2	1	0	0	0	0	0	1	0	1	0	0	0	0	0	0	0	0	0	1	1	1	0	0	0	0	0	0	0	0	0	4
102	56	1	195	100	0	56	157	1.57	22.7189	2	0	0	0	3	CKD	0	HTN	1	0	0	0	0	0	0	1	0	1	0	0	0	0	0	0	0	0	0	1	1	1	0	0	0	0	0	0	0	0	0	4
103	53.7	1	150	88	1	64	164	1.64	23.7953	2	0	0	0	3	CKD	0	HTN	1	0	0	0	0	0	0	0	0	0	0	0	0	0	0	0	0	0	0	0	0	0	0	0	0	0	0	0	0	0	0	0
104	45	1	145	95	0	70	149	1.49	31.5301	4	1	0	0	3	CKD	0	HTN	1	0	1	0	1	0	0	1	0	1	0	0	0	0	0	0	1	0	0	1	1	1	0	0	0	0	0	0	0	0	1	7
105	53.7	1	150	88	1	64	164	1.64	23.7953	2	1	0	0	3	CKD	0	HTN	1	0	0	0	0	0	0	0	0	0	0	0	0	0	0	0	0	0	0	0	0	0	0	0	0	0	0	0	0	0	0	0
106	52	1	102	75	0	48	152	1.52	20.7756	2	0	0	0	3	CKD	0	HTN	1	0	0	0	0	0	0	1	0	1	0	0	0	0	0	0	0	0	1	1	1	1	0	0	0	0	0	0	0	0	0	5
107	62	2	170	95	0	64	164	1.64	23.7953	2	0	0	0	3	CKD	0	HTN	1	0	0	0	0	0	0	1	0	1	0	0	0	0	0	0	0	0	0	1	1	1	0	0	0	0	0	0	0	0	0	4
108	62	2	190	80	1	67	157	1.57	27.1816	3	1	0	0	3	CKD	1	T2DM, HTN	2	1	0	0	0	0	1	0	0	0	1	0	0	0	0	0	0	0	0	1	1	1	0	0	0	0	0	0	0	0	0	5
109	65	2	178	84	0	65	150	1.5	28.8889	3	1	0	0	3	CKD	1	T2DM HTN	2	1	0	0	0	0	0	0	0	0	1	0	0	0	1	1	0	1	1	1	1	1	0	0	0	0	0	0	1	0	0	8
110	24	1	115	74	0	45	155	1.55	18.7305	2	0	0	0	3	CKD	0	Nephritis, SLE	2	0	0	0	0	0	0	0	0	0	0	0	0	0	0	0	0	0	0	0	0	1	0	0	0	0	0	0	0	1	0	2
111	31	1	128	92	0	46	150	1.5	20.4444	2	0	0	0	3	CKD	0	HTN	1	0	0	0	0	0	0	0	0	0	0	0	0	0	0	0	0	0	0	1	1	1	0	0	0	0	0	0	0	0	0	3
112	68	2	130	79	1	61	165	1.65	22.4059	2	0	0	0	3	CKD	0	HTN	1	0	0	0	0	0	0	1	0	1	0	0	0	0	0	0	0	1	0	1	1	1	0	0	0	0	0	0	0	0	0	5
113	60	2	175	97	0	56	154	1.54	23.6127	2	0	0	0	3	CKD	1	T2DM, HTN	1	1	0	0	0	0	0	0	0	0	1	0	0	0	0	0	0	0	1	1	0	1	0	0	0	0	0	0	0	0	0	4
114	63	2	146	94	1	61	168	1.68	21.6128	2	0	1	1	2	CKD	0	ADPKD, HTN	2	0	0	0	0	0	0	1	0	1	0	0	0	0	0	0	1	0	0	1	1	1	0	0	0	1	1	1	0	0	0	6
115	58	1	214	142	1	58	165	1.65	21.3039	2	0	1	1	3	CKD	0	HTN	1	0	1	0	1	0	1	1	0	1	0	0	0	0	0	0	0	1	0	1	1	1	0	0	0	0	0	0	0	0	0	7
116	53.7	1	165	97	0	64	150	1.5	28.4444	3	0	0	0	2	CKD	0	HTN	1	0	0	0	0	0	0	0	0	0	0	0	0	0	0	0	0	1	0	1	1	1	0	1	0	0	0	0	0	0	0	5
117	53.7	1	124	92	0	62	155	1.55	25.8064	3	0	0	0	2	CKD	0	HTN	1	0	0	0	0	0	0	0	0	0	0	0	0	0	0	0	1	1	0	0	0	0	0	0	0	0	0	0	0	0	0	2
118	59	1	125	83	1	81	167	1.67	29.0437	3	0	1	1	3	CKD	1	T2DM, HTN	2	1	0	0	0	0	0	1	0	1	0	0	0	0	0	0	0	0	1	1	1	1	0	0	0	0	0	0	0	0	0	5
119	47	1	154	79	0	64	164	1.64	23.7953	2	0	0	0	3	CKD	1	T2DM, HTN	2	1	0	0	0	0	0	0	0	0	0	0	0	0	0	0	0	1	1	1	1	1	0	0	0	0	0	0	0	0	0	5
120	56	1	159	78	0	64	164	1.64	23.7953	2	0	0	0	2	CKD	1	T2DM, DN, HT, HTN	4	2	1	0	1	0	0	1	0	1	0	0	0	0	1	1	0	1	0	0	1	1	0	1	0	0	0	0	0	0	1	8
121	29	1	180	129	0	44	160	1.6	17.1875	1	0	0	0	2	CKD	0	SLE, HTN	2	0	0	0	0	1	0	0	0	0	0	0	0	0	0	0	0	0	0	1	0	0	0	0	0	0	0	0	0	1	0	3
122	72	1	158	66	1	55	160	1.6	21.4844	2	0	0	1	3	CKD	0	HTN. HT	2	0	0	0	0	0	0	0	0	0	0	0	0	0	0	0	0	1	0	1	1	1	0	0	0	0	0	0	0	0	1	5
123	63	2	202	100	0	45	152	1.52	19.4771	2	0	0	0	2	CKD	0	HTN	1	1	0	0	0	0	1	0	0	0	0	0	0	0	0	0	0	0	0	1	1	1	0	0	0	0	0	0	0	0	0	4
124	67	2	170	68	1	78	165	1.65	28.6501	3	0	0	1	2	CKD	1	T2DN, HTN	2	1	1	0	1	0	0	0	0	0	0	0	0	0	1	1	0	1	0	0	1	1	0	0	0	0	0	0	0	0	0	5
125	62	2	154	70	0	54	142	1.42	26.7804	3	0	0	0	2	CKD	1	T2DNM, HTN	2	1	0	0	0	0	0	0	0	0	1	0	0	1	0	1	1	0	1	1	1	1	0	0	0	0	0	0	0	0	1	8
126	61	2	160	80	1	67	175	1.75	21.8775	2	0	0	1	2	CKD	0	HTN	1	0	0	0	0	0	0	1	0	1	0	0	0	0	0	0	0	1	1	1	1	1	0	0	0	0	0	0	0	0	0	6
127	58	1	145	95	0	51	169	1.69	17.8565	1	0	0	0	2	CKD	0	HTN, HT	2	0	0	0	0	0	0	1	0	1	0	0	0	0	0	0	0	1	0	1	0	0	0	0	0	0	0	0	1	0	0	4
128	61	2	171	95	1	70	162	1.62	26.6727	3	0	0	0	3	CKD	1	T2dm, Diabetic retinopathy, HTN	3	2	0	0	0	0	0	0	1	1	0	0	0	1	0	1	0	1	0	1	1	1	0	0	0	0	0	0	0	0	0	6
129	64	2	199	94	1	70	165	1.65	25.7116	3	1	0	1	3	CKD	0	HTN, PYELONEPHRITIS	2	0	0	0	0	0	1	1	0	1	0	0	0	0	0	0	0	0	0	1	1	1	0	0	0	0	0	0	0	0	0	5
130	50	1	128	80	0	52	167	1.67	18.6453	2	0	0	0	3	CKD	0	PYELONEPHRITIS	1	0	0	0	0	0	0	0	0	0	0	0	0	0	0	0	0	0	0	1	1	1	0	0	0	0	0	0	0	0	0	3
131	60	2	131	89	0	65	157	1.57	26.3702	3	0	0	0	2	CKD	0	HTN	1	0	0	0	0	0	0	1	0	1	0	0	0	0	0	0	0	0	0	1	1	1	0	0	0	0	0	0	0	0	0	4
132	36	1	172	108	1	74	165	1.65	27.1809	3	1	0	1	2	CKD	0	HTN	1	0	1	0	1	0	1	1	0	1	0	0	0	0	0	0	0	1	1	0	1	1	0	0	0	0	0	0	0	0	0	7
133	84	2	163	100	1	76	167	1.67	27.2509	3	0	0	1	2	CKD	0	HTN	1	0	0	0	0	0	0	0	0	0	0	0	0	0	0	0	0	0	0	1	1	1	0	0	0	0	0	0	0	0	0	3
134	67	2	190	86	0	47	155	1.55	19.5629	2	0	0	0	3	CKD	1	T2DM, HTN	2	1	0	0	0	0	0	0	0	0	1	0	0	0	0	0	0	1	0	1	1	1	0	0	0	0	0	0	0	0	0	5
135	65	2	163	99	1	63	170	1.7	21.7993	2	0	0	1	3	CKD	0	HTN, HT	2	0	0	0	0	0	0	1	0	1	0	0	0	0	0	0	0	0	0	1	1	1	0	0	0	0	0	0	0	0	0	4
136	57	1	160	90	1	88	158	1.58	35.2507	4	1	0	1	2	CKD	0	HTN, HT	2	0	1	0	1	0	0	0	0	0	0	0	0	0	0	0	0	0	0	1	1	1	0	0	0	0	0	0	0	0	1	5
137	54	1	173	93	1	65	165	1.65	23.8751	2	1	0	1	2	CKD	1	Diabetic nephropathy, HTN	2	2	0	0	0	0	0	1	0	1	0	0	0	0	0	0	0	0	1	1	1	1	0	0	0	0	0	0	0	0	0	5
138	31	1	128	88	1	68	163	1.63	25.5937	3	0	0	0	3	CKD	0	HTN	1	0	0	0	0	1	0	0	0	0	0	0	0	0	0	0	0	0	0	0	1	0	0	0	0	0	0	0	0	1	0	3
139	35	1	128	80	1	86	173	1.73	28.7346	3	1	0	0	2	CKD	0	IgA NEPHROPATHY, HTN	2	0	0	0	0	0	0	0	0	0	0	0	0	0	0	0	0	0	0	1	1	1	0	0	0	1	0	1	0	0	0	4
140	33	1	145	92	0	45	135	1.35	24.6913	2	0	0	0	3	CKD	0	PEDAL EDEMA HTN	2	0	0	0	0	0	0	0	0	0	0	0	0	0	0	0	0	1	1	1	1	1	0	0	0	0	0	0	0	0	0	5
141	44	1	174	92	1	72	183	1.83	21.4996	2	0	1	1	3	CKD	0	HTN	1	0	1	0	1	0	0	0	0	0	0	0	0	0	0	0	0	0	0	1	1	1	0	0	0	0	0	0	0	0	0	4
142	56	1	184	110	1	68	165	1.65	24.977	2	0	0	1	2	CKD	1	T2DM, HTN	2	1	0	0	0	0	1	1	0	1	1	0	0	0	0	0	0	0	1	1	1	1	0	0	0	0	0	0	1	0	0	8
143	63	2	139	74	0	56	159	1.59	22.151	2	0	0	0	2	CKD	1	T2DN, HTN	2	1	0	0	0	0	0	0	0	0	0	0	0	0	1	1	0	0	1	1	1	1	0	0	0	0	0	0	0	0	0	5
144	60	2	168	98	1	67	168	1.68	23.7386	2	0	0	1	3	CKD	1	T2DM, HTN	2	1	0	0	0	0	0	0	0	0	0	0	0	0	0	0	0	0	0	1	1	1	0	1	0	0	0	0	0	0	0	4
145	66	2	180	111	1	69	164	1.64	25.6543	3	0	0	1	3	CKD	0	HTN	1	0	0	0	0	1	0	1	0	1	0	0	0	0	0	0	0	1	0	1	1	1	0	0	0	0	0	0	0	0	0	6
146	54	1	142	85	1	82	168	1.68	29.0533	3	1	0	0	2	CKD	0	HTN, ULCERATIVE COLITIS	2	0	1	0	1	0	0	1	0	1	0	0	0	0	0	0	0	0	1	1	1	1	0	0	0	0	0	0	0	0	0	6
147	52	1	164	101	0	59	165	1.65	21.6712	2	0	0	0	2	CKD	0	HTN	1	0	0	0	0	0	0	1	0	1	0	0	0	0	0	0	0	0	0	1	1	1	0	0	0	0	0	0	0	0	0	4
148	65	2	178	86	0	52	162	1.62	19.814	2	1	0	0	2	CKD	1	T2DM, HTN	2	1	0	0	0	0	0	1	0	1	0	0	0	0	0	0	0	1	1	1	1	1	0	0	0	0	0	0	0	0	0	6
149	55	1	155	85	0	48	157	1.57	19.4734	2	0	0	0	3	CKD	1	T2DM, HTN	2	1	0	0	0	0	0	1	0	1	0	0	0	0	0	0	0	1	1	1	1	1	0	0	0	0	0	0	0	0	0	6
150	38	1	175	115	1	55	165	1.65	20.202	2	1	1	1	3	CKD	0	HTN	1	0	1	0	1	0	0	0	0	0	0	0	0	0	0	0	0	0	0	1	1	1	0	0	0	0	0	0	0	0	0	4
151	65	2	176	90	0	46	154	1.54	19.3962	2	0	0	0	2	CKD	0	HTN	1	0	0	0	0	0	0	1	0	1	0	0	0	0	0	0	1	1	0	1	1	1	0	1	0	0	0	0	0	0	0	7
152	65	2	145	85	0	73	155	1.55	30.385	4	1	0	0	2	CKD	1	T2DM, HTN	2	1	0	0	0	0	0	1	0	1	0	0	0	0	0	0	1	0	0	0	0	0	0	1	0	0	0	0	0	0	0	3
153	66	2	202	97	1	65	162	1.62	24.7675	2	0	0	1	2	CKD	1	T2DM, HTN	2	1	0	0	0	0	1	0	0	0	0	0	0	1	1	1	0	0	0	1	1	1	0	0	0	0	0	0	0	0	0	5
154	67	2	165	84	0	64	164	1.64	23.7953	2	0	0	0	3	CKD	1	T2DM , HTN	2	1	0	0	0	0	0	1	0	1	1	0	0	0	0	0	0	0	0	1	1	1	0	0	0	0	0	0	0	0	0	5
155	69	2	155	86	1	64	168	1.68	22.6757	2	1	0	0	2	CKD	0	HTN	1	0	1	0	1	0	0	0	0	0	0	0	0	0	0	0	1	0	0	0	0	1	0	0	1	0	0	0	0	0	1	5
156	40	1	150	98	1	70	164	1.64	26.0261	3	0	1	1	3	CKD	0	HTN, ANEMIA	2	0	0	0	0	0	0	0	0	0	0	0	0	0	0	0	0	1	0	1	1	1	0	0	0	0	0	0	0	0	0	4
157	45	1	132	80	1	64	166	1.66	23.2254	2	1	1	1	3	CKD	1	T2DM , HTN	2	1	0	0	0	0	0	0	0	0	0	0	0	1	0	1	0	1	0	1	1	1	0	0	0	0	0	0	0	0	0	5
158	70	2	160	92	1	64	163	1.63	24.0882	2	0	0	1	2	CKD	1	HTN, T2DM, DIABetic Nephropathy	3	2	0	0	0	1	0	0	0	0	1	0	0	0	0	0	0	1	1	0	1	0	0	1	0	0	0	0	0	0	0	6
159	48	1	148	89	1	70	168	1.68	24.8016	2	0	1	1	3	CKD	1	T2DM, HTN, CAD	3	1	0	0	0	0	0	0	0	0	0	0	0	0	0	0	0	0	1	0	1	0	0	1	0	0	0	0	0	0	0	3
160	80	2	167	99	1	59	162	1.62	22.4813	2	1	1	1	2	CKD	0	HTN, HT	2	0	1	0	1	0	0	0	0	0	0	0	0	0	0	0	0	0	0	1	1	0	0	0	0	0	0	0	0	0	0	3
161	49	1	140	100	1	72	168	1.68	25.5102	3	0	1	1	3	CKD	1	DM, HTN, PLKD	3	1	0	0	0	0	0	1	0	1	0	0	0	0	0	0	1	1	0	0	1	1	0	0	0	0	0	0	0	0	0	5
162	31	1	164	99	1	60	173	1.73	20.0474	2	0	0	0	3	CKD	0	HTN	1	0	0	0	0	1	0	0	0	0	0	0	0	0	0	0	0	0	0	1	1	1	0	0	0	0	0	0	0	0	0	4
163	64	2	132	82	0	46	155	1.55	19.1467	2	1	0	0	3	CKD	0	HTN	1	0	0	0	0	1	0	0	0	0	0	0	0	0	0	0	0	1	1	1	1	1	0	0	0	0	0	0	0	0	0	6
164	18	1	139	74	1	59	162	1.62	22.4813	2	0	1	0	3	CKD	0	HTN	1	0	0	0	0	0	0	1	0	1	0	0	0	0	0	0	0	1	0	1	1	1	0	0	0	0	0	0	0	0	0	5
165	62	2	143	86	1	72	166	1.66	26.1286	3	0	0	0	3	CKD	1	DM, HTN	2	1	0	0	0	0	0	0	0	0	0	0	0	0	0	0	0	0	1	1	0	0	0	0	0	1	0	1	0	0	0	3
166	55	1	204	118	1	68	175	1.75	22.2041	2	0	1	0	3	CKD	1	T2DM, HTN	2	1	1	0	1	0	1	1	0	1	0	0	0	0	1	1	0	0	0	1	1	1	0	0	0	0	0	0	0	0	0	7
167	50	1	153	93	1	64	173	1.73	21.3839	2	0	0	0	3	CKD	1	T2DM, HTN	2	1	0	0	0	0	0	0	0	0	1	0	0	1	0	1	0	1	1	1	1	1	0	0	0	0	0	0	0	0	0	7
168	43	1	124	70	1	63	173	1.73	21.0498	2	1	0	0	2	CKD	0	HTN	1	0	1	0	1	0	0	0	0	0	0	0	0	0	0	0	0	0	0	1	1	1	0	0	0	0	0	0	0	0	0	4
169	45	1	147	92	0	53	154	1.54	22.3478	2	1	0	0	2	CKD	0	HTN	1	0	1	0	1	0	0	1	0	1	0	0	0	0	0	0	0	0	0	1	1	1	0	0	0	0	0	0	0	0	0	5
170	58	1	155	86	1	58	160	1.6	22.6562	2	0	1	1	3	CKD	0	HTN	1	0	1	0	1	0	0	1	0	1	0	0	0	0	0	0	0	0	0	1	1	1	0	0	0	0	0	0	0	0	0	5
171	53.7	1	166	84	1	72	160	1.6	28.125	3	0	0	1	3	CKD	1	T2DM, HTN	2	1	0	0	0	0	1	0	0	0	1	0	0	0	0	0	0	1	0	1	0	1	0	0	0	0	0	0	1	0	0	6
172	45	1	144	91	0	45	153	1.53	19.2234	2	0	0	0	2	CKD	0	HTN	2	0	0	0	0	0	0	0	0	0	0	0	0	0	0	0	0	1	1	1	1	1	0	0	0	0	0	0	0	0	0	5
173	54	1	160	94	1	64	164	1.64	23.7953	2	0	0	1	2	CKD	1	T2DM, HTN	2	1	0	0	0	0	0	1	0	1	0	1	0	0	0	1	0	0	0	1	0	0	0	1	0	0	0	0	0	0	0	4
174	67	2	168	84	1	55	165	1.65	20.202	2	1	1	1	2	CKD	0	HTN, CAD, AKI	3	0	1	0	1	0	0	0	0	0	0	0	0	0	0	0	1	0	0	1	1	1	0	0	1	0	0	0	0	0	0	6
175	53.7	1	141	83	0	64	155	1.55	26.6389	3	1	0	0	2	CKD	1	T2DM, HTN	2	1	1	0	1	0	0	0	0	0	0	0	0	1	0	1	0	1	1	1	1	1	0	0	0	0	0	0	0	0	0	7
176	26	1	140	86	0	51	150	1.5	22.6666	2	0	0	0	2	CKD	0	HTN	1	0	1	0	1	0	0	1	0	1	0	0	0	0	0	0	0	1	0	1	0	1	0	0	0	0	0	0	0	0	0	5
177	75	2	191	97	1	71	165	1.65	26.0789	3	1	0	1	2	CKD	1	T2DM, HTN	2	1	1	0	1	0	0	0	0	0	0	0	0	0	1	1	0	1	1	1	1	1	0	0	0	0	0	0	0	0	0	7
178	53.7	1	132	69	0	51	162	1.62	19.433	2	0	0	0	3	CKD	0	HTN	1	0	1	0	1	0	0	1	0	1	0	0	0	0	0	0	0	1	0	1	1	0	0	0	0	0	0	0	0	0	0	5
179	20	1	185	120	0	64	158	1.58	25.6369	3	0	0	0	3	CKD	0	HTN	1	0	0	0	0	0	0	1	0	1	0	0	0	0	0	0	0	1	0	1	1	1	0	0	0	0	0	0	0	0	0	5
180	35	1	113	101	0	64	164	1.64	23.7953	2	0	0	0	2	CKD	0	HTN, SLE, HT	3	0	0	0	0	0	1	1	0	1	0	0	0	0	0	0	0	0	0	1	1	0	0	1	0	0	0	0	0	1	1	7
181	31	1	157	86	0	64	164	1.64	23.7953	2	0	0	0	2	CKD	0	HTN	1	0	1	0	1	0	0	0	0	0	0	0	0	0	0	0	0	1	0	1	1	1	0	0	0	0	0	0	0	0	0	5
182	76	2	173	100	0	64	164	1.64	23.7953	2	0	0	0	3	CKD	0	HTN, PYELONEPHRITIS	2	0	0	0	0	0	1	0	0	0	0	0	0	0	0	0	0	1	1	1	1	1	0	0	0	0	0	0	0	0	0	6
183	72	2	135	71	1	63	162	1.62	24.0055	2	1	1	1	2	CKD	0	HTN	1	0	0	0	0	0	0	0	0	0	0	0	0	0	0	0	0	0	0	1	1	1	0	0	0	0	0	0	0	0	0	3
184	70	2	121	93	1	66	173	1.73	22.0522	2	1	0	1	2	CKD	1	T2DM, HTN	2	1	1	0	1	0	0	0	0	0	1	0	0	0	0	0	0	1	1	1	1	1	0	1	0	0	0	0	0	0	0	8
185	55	1	154	73	0	65	152	1.52	28.1336	3	1	0	0	3	CKD	1	T2DM, HT	2	1	0	0	0	0	0	0	0	0	0	0	0	1	0	1	0	0	0	1	1	1	0	0	0	0	0	0	0	0	1	5
186	55	1	163	69	0	46	152	1.52	19.91	2	1	0	0	3	CKD	0	HTN	1	0	0	0	0	0	0	1	0	1	0	0	0	0	0	0	0	0	1	1	1	1	0	0	0	0	0	0	0	0	0	5
187	70	2	155	95	1	68	167	1.67	24.3823	2	1	0	1	3	CKD	0	HTN	1	0	0	0	0	0	0	0	0	0	0	0	0	0	0	0	0	0	1	1	1	1	0	0	0	1	0	1	0	0	0	5
188	62	2	168	96	1	57	162	1.62	21.7192	2	1	0	0	3	CKD	1	T2DM, HTN	2	1	0	0	0	0	0	1	0	1	0	0	0	0	0	0	0	0	0	1	1	1	0	0	0	0	0	0	0	0	0	4
189	52	1	156	73	1	70	162	1.62	26.6727	3	1	1	1	2	CKD	1	DM, HTN,HT	3	1	1	0	1	0	0	0	0	0	0	0	0	0	0	0	1	0	1	1	1	1	0	0	0	0	0	0	0	0	1	7
190	24	1	91	62	0	39	148	1.48	17.8049	2	0	0	0	2	CKD	0	HTN	1	0	0	0	0	0	0	1	0	1	0	0	0	0	0	0	0	0	0	1	1	1	0	0	0	0	0	0	0	0	0	4
191	43	1	138	79	1	74	160	1.6	28.9062	3	1	0	1	3	CKD	0	HTN, NEPHROTIC SYNDROME	2	0	0	0	0	1	0	0	0	0	0	0	0	1	0	1	1	0	0	0	1	0	0	0	0	0	0	0	0	0	0	4
192	75	2	129	72	1	55	170	1.7	19.0311	2	1	0	0	2	CKD	1	T2DM, HTN	2	1	0	0	0	0	0	0	0	0	0	0	1	0	0	1	0	1	1	0	1	1	0	0	0	0	0	0	0	0	0	5
193	58	1	130	77	0	93	160	1.6	36.3281	4	1	0	0	2	CKD	1	T2DM, NEPHROTIC SYNDROME	2	1	1	0	1	0	0	0	0	0	0	0	0	0	0	0	0	0	0	1	1	1	0	0	0	0	0	0	0	0	0	4
194	38	1	124	104	0	48	161	1.61	18.5178	2	0	0	0	3	CKD	0	HTN	1	0	1	0	1	0	0	1	0	1	0	0	0	0	0	0	0	0	0	1	1	1	0	0	0	0	0	0	0	0	0	5
195	58	1	126	78	0	74	152	1.52	32.0291	4	0	0	0	2	CKD	1	T2DM, HTN	2	1	0	0	0	0	1	1	0	1	0	0	0	0	0	0	0	1	1	1	0	1	0	0	0	1	0	1	0	0	0	7
196	54	1	112	96	1	56	159	1.59	22.151	2	0	1	1	3	CKD	1	T2DM, HTN	2	1	1	0	1	0	0	0	0	0	0	0	0	0	0	0	0	0	1	1	1	1	0	0	0	0	0	0	0	0	0	5
197	42	1	144	83	1	47	155	1.55	19.5629	2	0	0	0	3	CKD	1	T2DM, HTN	2	1	0	0	0	0	0	1	0	1	0	0	0	0	0	0	0	1	0	1	1	1	0	0	0	0	0	0	0	0	0	5
198	70	2	128	80	1	72	150	1.5	32	4	0	0	0	3	CKD	0	HTN	1	0	1	0	1	0	0	0	0	0	0	0	0	0	0	0	0	0	0	1	1	1	0	0	0	0	0	0	0	0	0	4
199	30	1	160	88	1	58	165	1.65	21.3039	2	0	1	0	3	CKD	0	HTN	1	0	0	0	0	0	1	1	0	1	0	0	0	0	0	0	0	1	1	1	1	1	0	0	0	0	0	0	0	0	0	7
200	63	2	172	70	0	49	153	1.53	20.9321	2	0	0	0	2	CKD	1	T2DM, HTN, DN	3	2	1	0	1	0	1	0	0	0	0	1	0	0	0	1	0	0	1	1	1	1	0	0	0	0	0	0	0	0	0	7
201	49	1	149	100	1	55	154	1.54	23.1911	2	1	1	1	2	CKD	1	T2DM, HTN	2	1	0	0	0	0	0	1	0	1	0	0	0	0	1	1	0	0	0	1	1	1	0	0	0	0	0	0	0	0	0	5
202	59	1	189	94	1	69	166	1.66	25.0399	3	1	0	1	2	CKD	1	T2DM, HTN	2	1	0	0	0	1	0	1	0	1	0	0	0	1	1	1	1	1	0	1	1	1	0	0	0	0	0	0	0	0	0	8
203	35	1	119	83	1	62	163	1.63	23.3354	2	1	1	1	3	CKD	1	T2DM. HTN	2	1	0	0	0	0	0	0	0	0	1	0	0	0	0	0	0	1	0	0	1	1	0	0	0	0	0	0	0	0	0	4
204	81	2	177	93	0	56	145	1.45	26.6349	3	1	0	0	2	CKD	1	T2DM, HTN	2	1	1	0	1	0	0	0	0	0	0	0	0	0	0	0	0	1	0	0	1	1	0	0	0	0	0	0	0	0	0	4
205	56	1	124	92	1	78	183	1.83	23.2912	2	0	0	1	2	CKD	1	T2DM, HTN, DN	3	2	0	0	0	0	0	1	0	1	0	0	0	0	0	0	0	0	1	1	1	1	0	0	0	0	0	0	0	0	0	5
206	40	1	97	70	0	75	162	1.62	28.5779	3	1	0	0	2	CKD	0	HTN	1	0	0	0	0	0	0	0	0	0	0	0	0	0	0	0	0	1	0	1	1	1	0	0	0	0	0	0	0	0	0	4
207	70	2	166	90	0	57	165	1.65	20.9366	2	1	0	0	2	CKD	0	HTN	1	0	0	0	0	0	0	1	0	1	0	0	0	0	0	0	0	1	1	1	1	1	0	0	0	0	0	0	0	0	0	6
208	66	2	158	80	1	58	168	1.68	20.5499	2	1	0	0	2	CKD	1	DM, HTN, DIABETIC FOOT	3	2	0	0	0	0	0	1	0	1	1	0	0	0	0	0	0	1	1	0	1	0	0	0	0	0	0	0	0	0	0	5
209	41	1	158	90	0	49	157	1.57	19.8791	2	0	0	0	2	CKD	1	HTN	1	0	0	0	0	0	0	1	0	1	0	0	0	0	0	0	0	1	0	1	0	1	0	0	0	0	0	0	1	0	0	5
210	26	1	170	90	1	68	173	1.73	22.7204	2	1	0	0	2	CKD	0	HTN	1	0	0	0	0	0	0	0	0	0	0	0	0	0	0	0	0	1	0	1	1	1	0	0	0	0	0	0	0	0	0	4
211	36	1	135	100	1	100	168	1.68	35.4308	4	1	1	1	3	CKD	0	HTN	1	0	0	0	0	1	0	1	0	1	0	0	0	0	0	0	0	0	0	1	1	1	0	0	0	0	0	0	0	0	0	5
212	52	1	162	92	0	49	150	1.5	21.7778	2	0	0	0	2	CKD	1	T2DM, HTN, DR	3	2	0	0	0	0	0	0	0	0	0	0	0	1	0	1	1	1	0	1	1	1	0	0	0	0	0	0	0	0	0	6
213	53	1	190	90	1	82	178	1.78	25.8805	3	0	1	1	3	CKD	1	T2DM, HTN	2	1	0	0	0	0	0	1	0	1	1	0	0	0	0	0	0	1	0	0	0	0	0	0	0	0	0	0	0	0	0	3
214	54	1	142	78	1	58	168	1.68	20.5499	2	1	0	0	2	CKD	1	T2DM ,HTN	2	1	0	0	0	0	0	0	0	0	0	0	0	1	0	1	0	1	0	1	1	1	0	1	0	0	0	0	0	0	0	6
215	68	2	156	95	0	52	157	1.57	21.0962	2	0	0	0	2	CKD	1	T2DM, HTN, CAD	3	1	0	0	0	0	0	0	0	0	1	1	0	0	0	1	0	1	0	1	1	1	0	1	0	0	0	0	0	0	0	7
216	65	2	150	78	0	74	157	1.57	30.0215	4	0	0	0	2	CKD	1	T2DM, HTN	2	1	0	0	0	0	0	1	0	1	1	0	0	0	0	0	0	1	0	0	0	0	0	0	0	0	0	0	0	0	0	3
217	80	2	160	92	0	70	152	1.52	30.2978	4	0	0	0	2	CKD	0	HTN	1	0	1	0	1	0	1	0	0	0	0	0	0	0	0	0	0	0	0	1	1	1	0	0	0	0	0	0	0	0	0	5
218	80	2	119	76	1	63	173	1.73	21.0498	2	0	1	1	2	CKD	1	T2DM ,HTN	2	1	0	0	0	0	0	1	0	1	0	0	0	0	0	0	0	1	0	1	1	1	0	0	0	0	0	0	0	0	0	5
219	53.7	1	150	88	1	64	164	1.64	23.7953	2	0	1	1	2	CKD	0	HTN	1	0	0	0	0	0	0	0	0	0	0	0	0	0	0	0	0	0	0	0	0	0	0	0	0	0	0	0	0	0	0	0
220	52	1	111	73	0	46	155	1.55	19.1467	2	0	0	0	3	CKD	1	T2DM, HTN	2	1	0	0	0	0	0	0	0	0	0	0	0	1	0	1	0	0	0	1	1	1	0	0	0	0	0	0	0	0	0	4
221	53.7	1	141	95	0	64	164	1.64	23.7953	2	1	0	0	2	CKD	0	HTN	1	0	0	0	0	0	0	1	0	1	0	0	0	0	0	0	0	0	0	1	1	1	0	0	0	0	0	0	0	0	0	4
222	40	1	140	77	1	77	174	1.74	25.4327	3	0	1	1	2	CKD	0	HTN	1	0	0	0	0	0	0	1	0	1	0	0	0	0	0	0	0	0	0	0	0	0	0	0	0	0	0	0	0	0	0	1
223	73	2	104	50	1	67	152	1.52	28.9993	3	1	0	1	2	CKD	0	HTN, COPD	2	0	0	0	0	0	0	0	0	0	0	0	0	0	0	0	0	0	0	1	0	0	0	0	0	0	0	0	1	0	0	2
224	46	1	158	104	1	65	167	1.67	23.3067	2	1	0	1	3	CKD	1	T2DM , HTN	2	0	1	0	1	0	0	0	0	0	0	0	0	0	0	0	0	0	0	1	1	1	0	1	0	0	0	0	0	0	0	5
225	66	2	128	75	1	60	165	1.65	22.0385	2	1	0	1	3	CKD	0	HTN, HT	2	0	1	0	1	0	0	0	0	0	0	0	0	0	0	0	0	0	1	0	0	0	0	0	0	0	0	0	0	0	1	3
226	49	1	156	89	0	90	170	1.7	31.1418	4	0	0	0	2	CKD	1	DM, HTN, HT	3	1	0	0	0	0	0	0	0	0	0	0	0	0	0	0	0	0	1	1	1	0	0	0	0	0	0	0	0	0	0	3
227	55	1	174	90	1	76	175	1.75	24.8163	2	0	0	0	2	CKD	1	DM, HTN, EDEMA	3	1	0	0	0	0	0	1	0	1	1	0	0	0	0	0	0	1	0	0	0	1	0	0	0	0	0	0	0	0	0	4
228	51	1	137	82	0	44	158	1.58	17.6254	1	0	0	0	2	CKD	1	T2DM, CAD, HTN, DN	4	2	1	0	1	0	0	0	0	0	0	0	0	1	0	1	0	0	0	1	1	1	0	1	0	0	0	0	0	0	0	6
229	62	1	152	79	0	45	155	1.55	18.7305	2	1	0	0	3	CKD	1	T2DM, CAD, HTN, PYELONEPHRITIS	4	1	1	0	1	0	0	0	0	0	0	1	0	0	0	1	0	0	0	0	1	1	1	1	1	0	0	0	0	0	0	7
230	61	1	125	80	1	87	178	1.78	27.4586	3	0	0	1	2	CKD	0	HTN	1	0	1	0	1	0	0	0	0	0	0	1	0	0	0	1	0	0	0	1	1	0	0	0	0	0	0	0	0	0	0	4
231	52	1	150	90	1	92	170	1.7	31.8339	4	1	0	1	1	CKD	1	DM, HTN, IGN, DN	4	2	0	0	0	0	0	1	0	1	0	1	0	0	0	1	0	1	0	1	1	0	0	1	0	0	0	0	0	0	0	6
232	22	1	110	74	1	65	178	1.78	20.5151	2	0	1	1	2	CKD	0	HTN, APKD	2	0	0	0	0	0	0	1	0	1	0	0	0	0	0	0	0	0	0	1	1	1	0	0	0	0	0	0	0	0	0	4
233	58	1	168	89	1	63	170	1.7	21.7993	2	0	0	1	3	CKD	1	DM, DN, HTN, NPDR	4	2	0	0	0	0	0	0	0	0	0	0	0	0	0	0	0	0	1	1	0	0	0	0	0	1	0	1	0	0	0	3
234	49	1	132	78	1	72	171	1.71	24.6229	2	1	0	1	3	CKD	0	HTN	1	0	0	0	0	0	0	1	0	1	0	0	0	0	0	0	0	1	0	1	1	1	0	0	0	0	0	0	0	0	0	5
235	47	1	160	90	1	72	168	1.68	25.5102	3	1	0	1	2	CKD	0	HTN, CGN	2	0	0	0	0	0	1	1	0	1	0	0	0	0	0	0	1	0	0	0	1	0	0	0	0	0	0	0	0	0	0	4
236	62	2	164	98	0	54	157	1.57	21.9076	2	0	0	0	3	CKD	1	T2DM, HTN	2	0	0	0	0	0	0	1	0	1	0	0	0	0	0	0	0	1	0	1	1	1	0	1	0	0	0	0	1	0	0	7
237	60	2	170	90	0	45	150	1.5	20	2	0	0	0	2	CKD	0	HTN, ADPKD	2	0	0	0	0	0	0	1	0	1	0	0	0	0	0	0	0	1	1	1	1	1	0	0	0	0	0	0	0	0	0	6
238	29	1	173	91	1	65	162	1.62	24.7675	2	0	0	1	3	CKD	0	HTN	1	0	1	0	1	0	0	0	0	0	0	0	0	0	0	0	0	1	0	1	1	1	0	0	0	0	0	0	0	0	0	5
239	70	2	180	90	0	63	178	1.78	19.8838	2	0	0	0	2	CKD	0	HTN	1	0	1	0	1	0	0	1	0	1	0	0	0	0	0	0	0	0	0	0	1	1	0	0	0	0	0	0	0	0	0	4
240	60	2	138	80	1	82	173	1.73	27.3981	3	1	0	0	2	CKD	1	T2DM, CAD, HTN	3	1	0	0	0	0	0	0	0	0	0	0	0	0	0	0	0	0	0	1	1	1	0	1	0	0	0	0	0	0	0	4
241	33	1	134	78	1	68	157	1.57	27.5873	3	1	0	1	3	CKD	0	HTN	1	0	0	0	0	0	0	0	0	0	0	0	0	0	0	0	0	1	0	0	1	1	0	0	0	0	0	0	0	0	0	3
242	64	2	172	109	0	60	155	1.55	24.974	2	0	0	0	3	CKD	0	HTN, ADPKD	2	0	0	0	0	0	1	1	0	1	0	0	0	0	0	0	0	1	0	1	1	1	0	0	0	0	0	0	0	0	0	6
243	64	2	132	70	1	54	167.6	1.676	19.2241	2	0	0	1	3	CKD	1	DM, HTN	2	1	0	0	0	0	0	0	0	0	0	0	0	0	0	0	0	1	0	1	1	1	0	0	0	0	0	0	0	0	0	4
244	46	1	156	99	0	69	157	1.57	27.993	3	1	0	0	3	CKD	0	HTN	1	0	0	0	0	0	0	1	0	1	0	0	0	0	0	0	0	0	0	1	1	1	0	0	0	0	0	0	0	0	0	4
245	20	1	159	110	1	68	165	1.65	24.977	2	0	0	0	3	CKD	0	HTN	1	0	0	0	0	0	0	1	0	1	0	0	0	0	0	0	0	1	0	1	1	1	0	0	0	0	0	0	1	0	0	6
246	63	2	155	93	0	53	166	1.66	19.2335	2	0	0	0	3	CKD	1	HTN, RETINOPATHY, DM	3	2	0	0	0	0	0	1	0	1	0	0	0	0	0	0	1	0	1	0	1	1	0	0	0	0	0	0	0	0	0	5
247	25	1	172	76	1	53	168	1.68	18.7783	2	0	0	0	3	CKD	0	HTN	1	1	0	0	0	1	0	0	0	0	0	0	0	0	0	0	0	0	1	1	1	1	0	0	0	0	0	0	0	0	0	5
248	81	2	164	70	1	85	170	1.7	29.4117	3	1	0	1	2	CKD	1	T2DM, HTN, CHF	3	1	0	0	0	0	0	0	0	0	0	0	0	0	0	0	0	1	1	1	1	1	0	0	0	0	0	0	0	0	0	5
249	56	1	148	56	1	60	170	1.7	20.7612	2	1	1	1	2	CKD	0	HTN	1	0	0	0	0	0	0	1	0	1	0	0	0	0	0	0	1	0	0	1	1	1	0	0	0	0	0	0	0	0	0	5
250	68	2	181	99	1	69	175	1.75	22.5306	2	0	0	1	3	CKD	0	HTN, RENAL CALCULI	2	0	1	0	1	0	0	0	0	0	0	0	0	0	0	0	0	1	0	0	0	1	0	0	0	0	0	0	0	0	0	3
251	31	1	100	61	0	85	165	1.65	31.2213	4	0	0	0	3	CKD	0	HTN, NEPHROTIC SYNDROME	2	0	1	0	1	0	0	1	0	1	0	0	0	0	0	0	1	1	0	0	1	0	0	0	0	0	0	0	0	0	0	5
252	60	2	176	95	0	49	157	1.57	19.8791	2	0	0	0	3	CKD	0	HTN, RENAL CALCULI	2	0	0	0	0	0	0	1	0	1	0	0	0	0	0	0	0	0	0	1	1	1	0	0	0	0	0	0	0	0	0	4
253	43	1	144	100	0	37	170	1.7	12.8028	1	0	0	0	3	CKD	0	HTN	1	0	0	0	0	0	0	1	0	1	0	0	0	0	0	0	0	1	1	1	1	1	0	0	0	0	0	0	0	0	0	6
254	69	2	170	70	1	72	175	1.75	23.5102	2	1	0	1	3	CKD	1	HTN, DM, DIABETIC FOOT	3	2	1	0	1	0	0	0	0	0	0	0	0	0	0	0	0	1	1	1	1	1	0	0	0	0	0	0	0	0	0	6
255	55	1	123	75	0	41	155	1.55	17.0655	1	0	0	0	3	CKD	0	HTN	1	0	0	0	0	0	0	1	0	1	0	0	0	0	0	0	0	1	1	1	0	0	0	0	1	0	0	0	0	0	0	5
256	63	2	153	87	0	80	157	1.57	32.4556	4	1	0	0	2	CKD	1	T2DM, HTN	2	1	0	0	0	0	1	0	0	0	1	0	0	0	1	1	1	1	1	1	1	1	0	1	0	0	0	0	0	0	0	10
257	55	1	147	93	1	93	165	1.65	34.1597	4	1	1	1	3	CKD	0	ADPKD, HTN	2	0	0	0	0	0	0	0	0	0	0	0	0	0	0	0	0	1	0	1	1	1	0	1	0	0	0	0	0	0	0	5
258	63	2	206	87	0	53	160	1.6	20.7031	2	1	0	0	2	CKD	1	T2DM, HTN, CAD	3	1	1	0	1	0	1	0	1	1	0	0	0	0	1	1	1	0	0	0	1	1	0	0	0	0	0	0	0	0	0	7
259	51	1	189	103	1	72	165	1.65	26.4463	3	0	1	1	2	CKD	1	T2DM, HTN, CAD	3	1	0	0	0	0	0	0	0	0	0	0	0	0	0	0	1	0	1	0	0	0	0	1	1	0	0	0	0	0	0	4
260	52	1	140	77	1	77	168	1.68	27.2817	3	0	0	0	2	CKD	1	T2DM, HTN, DIABETIC NEPHROPATHY	3	2	0	0	0	0	0	1	0	1	1	0	0	1	0	1	0	1	1	1	1	1	0	0	0	0	0	0	0	0	0	8
261	55	1	164	94	0	49	162	1.62	18.6709	2	0	0	0	1	CKD	1	T2DM, HTN, DCMP	3	1	0	0	0	0	0	1	0	1	0	0	0	0	0	0	0	1	0	0	0	0	0	1	0	0	0	0	0	0	0	3
262	78	2	174	103	0	48	155	1.55	19.9792	2	0	0	0	3	CKD	0	HTN	1	0	0	0	0	0	0	1	0	1	0	1	0	0	0	1	1	1	0	1	1	1	0	0	0	0	0	0	0	0	0	7
263	26	1	141	79	1	61	171	1.71	20.8611	2	1	0	1	2	CKD	0	KIDNEY STONES	1	0	0	0	0	0	0	1	0	1	0	0	0	0	0	0	0	0	1	1	1	1	0	0	0	0	0	0	0	0	0	5
264	70	2	149	87	1	48	170	1.7	16.609	1	1	0	1	2	CKD	1	T2DM, HTN	2	1	0	0	0	0	0	0	0	0	0	0	0	0	0	0	0	1	0	1	1	1	0	0	0	0	0	0	0	0	0	4
265	24	1	117	76	0	54	157	1.57	21.9076	2	0	0	0	2	CKD	0	HTN	1	0	0	0	0	0	0	1	0	1	0	0	0	0	0	0	0	1	0	0	1	1	0	0	0	0	0	0	0	0	0	4
266	51	1	176	96	1	75	173	1.73	25.0593	3	0	1	1	2	CKD	1	T2DM,HTN,CAD	3	1	0	0	0	0	0	1	0	1	1	0	0	0	0	0	0	0	0	1	1	0	0	1	1	1	0	1	1	0	0	8
267	88	2	98	83	1	69	173	1.73	23.0545	2	1	0	1	2	CKD	1	T2DM, HTN, HT	3	1	0	0	0	0	0	0	0	0	1	0	0	0	0	0	0	0	0	1	1	1	0	0	0	0	0	0	0	0	1	5
268	45	1	144	98	1	45	157	1.57	18.2563	1	1	0	1	3	CKD	0	HTN	1	0	0	0	0	0	0	1	1	1	0	0	0	0	0	0	0	0	0	1	1	1	0	0	0	0	0	0	0	0	0	4
269	44	1	118	84	0	55	168	1.68	19.4869	2	0	0	0	2	CKD	0	HTN	1	0	1	0	1	0	0	0	0	0	0	0	0	0	0	0	0	0	1	0	0	0	0	0	0	0	0	0	0	0	0	2
270	59	1	147	76	1	69	170	1.7	23.8754	2	1	0	1	2	CKD	1	T2DM, HTN, HT	3	1	0	0	0	0	0	1	0	1	1	0	0	0	0	0	0	1	1	1	0	0	0	0	0	0	0	0	1	0	0	6
271	49	1	150	100	1	52	165	1.65	19.1001	2	0	0	0	3	CKD	0	ADPKD, HTN	2	0	0	0	0	0	0	1	0	1	0	0	0	0	0	0	0	0	0	1	1	1	0	0	0	0	0	0	0	0	0	4
272	70	2	180	96	1	52	165	1.65	19.1001	2	0	0	1	3	CKD	0	POLYSCYSTOC KIDNEY DISEASE, HTN, COPD	3	0	0	0	0	0	0	1	0	1	0	0	0	0	0	0	0	1	0	1	1	1	0	0	0	0	0	0	0	0	0	5
273	64	2	144	70	1	90	165	1.65	33.0578	4	1	1	1	2	CKD	1	T2DM, HTN	2	1	0	0	0	0	0	1	0	1	1	0	0	0	0	0	0	1	0	1	1	0	0	0	1	0	0	0	0	0	0	6
274	55	1	149	90	0	58	152	1.52	25.1039	3	1	0	0	2	CKD	0	HTN	1	0	0	0	0	0	0	0	0	0	0	0	0	0	0	0	0	1	1	1	1	1	0	1	1	1	0	1	0	0	0	8
275	45	1	143	75	1	69	170	1.7	23.8754	2	1	1	1	2	CKD	1	T2DM, HTN	2	1	0	0	0	0	0	1	0	1	1	0	0	0	0	0	0	1	1	1	1	1	0	0	0	0	0	0	0	0	0	7
276	52	1	170	98	1	93	180	1.8	28.7037	3	1	0	1	2	CKD	0	HTN	1	0	1	0	1	0	0	0	0	0	0	0	0	0	0	0	0	0	1	0	0	1	0	0	0	1	0	1	0	0	0	4
277	45	1	177	101	0	65	152	1.52	28.1336	3	1	0	0	2	CKD	1	T2DM ,HTN, DIABETIC NEPHROPATHY, RETINOPATHY	4	2	0	0	0	0	0	1	0	1	1	0	0	0	0	0	0	0	0	1	1	1	0	1	0	0	0	0	0	0	0	6
278	70	2	129	90	0	50	152	1.52	21.6413	2	1	0	0	2	CKD	1	T2DM, AKI, PYELONEPHRITIS	3	1	0	0	0	0	0	0	0	0	0	0	0	0	1	1	0	1	1	1	0	1	0	0	0	0	0	0	0	1	0	6
279	29	1	142	93	1	57	165	1.65	20.9366	2	1	0	0	2	CKD	0	HTN, NEPHROTIC SYNDROME	2	0	0	0	0	0	0	1	0	1	0	0	0	0	0	0	1	0	0	0	0	0	0	0	0	0	0	0	0	0	0	2
280	74	2	96	51	1	55	178	1.78	17.3589	1	1	0	1	2	CKD	0	HTN	1	0	0	0	0	0	0	1	0	1	0	0	0	0	0	0	0	0	1	1	1	0	0	0	0	0	0	0	0	0	0	4
281	43	1	100	70	0	54	165	1.65	19.8347	2	1	0	0	3	CKD	1	T2DM, HTN, MEMBRANOUS NEPHROPATHY	3	1	1	0	1	1	0	0	0	0	1	1	1	0	0	1	1	0	0	0	0	0	0	0	0	0	0	0	0	0	1	6
282	67	2	150	117	0	49	157	1.57	19.8791	2	1	0	0	2	CKD	0	HTN	1	0	1	0	1	0	0	0	0	0	0	0	0	0	0	0	0	0	1	1	1	1	0	0	1	0	0	0	0	0	0	6
283	61	2	66	58	1	81	160	1.6	31.6406	4	1	1	1	3	CKD	0	HTN, COPD	2	0	1	0	1	0	0	0	0	0	0	0	0	0	0	0	0	1	0	1	0	0	0	0	0	0	0	0	0	0	0	3
284	37	1	127	89	1	69	178	1.78	21.7775	2	1	0	0	2	CKD	0	HTN	1	0	0	0	0	0	0	1	0	1	0	0	0	0	0	0	0	1	0	1	1	0	0	0	0	0	0	0	0	0	0	4
285	71	2	110	80	1	70	170	1.7	24.2214	2	1	1	0	3	CKD	0	HTN, LIVER DISEASE	2	1	0	0	0	0	0	0	0	0	0	0	0	0	0	0	0	0	1	0	1	1	0	0	0	0	0	0	0	0	0	3
286	70	2	164	88	0	48	152	1.52	20.7756	2	1	0	0	2	CKD	0	HTN	1	0	0	0	0	0	0	1	0	1	0	0	0	0	0	0	0	0	0	0	0	0	0	0	0	0	0	0	0	0	0	1
287	55	1	130	80	1	58	155	1.55	24.1415	2	1	0	0	2	CKD	1	T2DM, HTN, HT	3	1	0	0	0	0	0	1	1	1	1	0	0	0	0	0	1	1	1	1	1	0	0	0	0	0	0	0	0	0	1	8
288	42	1	127	90	0	62	173	1.73	20.7157	2	1	0	0	2	CKD	1	T2DM, HT,HTN, RENALCALCULI	4	1	0	0	0	0	0	0	0	0	1	0	0	0	0	0	0	1	0	1	1	0	0	0	0	0	0	0	0	0	1	5
289	69	2	181	77	0	54	152	1.52	23.3726	2	1	0	0	2	CKD	0	HTN	1	0	0	0	0	0	1	0	0	0	0	0	0	0	0	0	0	1	0	1	1	0	0	0	0	0	0	0	0	0	0	4
290	47	1	152	100	1	92	200	2	23	2	1	0	1	3	CKD	0	HTN	1	0	0	0	0	0	0	1	0	1	0	0	0	0	0	0	0	1	0	1	1	0	0	0	0	0	0	0	0	0	0	4
291	53	1	137	99	0	50	162	1.62	19.052	2	0	0	0	2	CKD	0	HTN, LUPUS NEPHRITIS	2	0	0	0	0	0	0	0	0	0	0	0	0	0	0	0	1	1	0	1	1	0	0	0	0	0	0	0	0	1	0	5
292	43	1	174	99	1	82	178	1.78	25.8805	3	1	0	1	2	CKD	0	HTN	1	0	0	0	0	0	0	1	0	1	0	0	0	0	0	0	0	0	0	1	1	0	0	0	0	0	0	0	0	0	0	3
293	46	1	192	105	1	57	175	1.75	18.6122	2	0	1	1	3	CKD	1	T2DM, HTN	2	1	0	0	0	0	0	1	0	1	1	0	0	0	1	1	0	0	0	1	1	0	0	0	0	0	0	0	0	0	0	5
294	78	2	172	92	1	69	170	1.7	23.8754	2	0	0	0	3	CKD	1	DM, HTN	2	1	0	0	0	0	1	1	0	1	0	0	0	0	0	0	0	0	0	0	1	1	0	0	0	0	0	0	0	0	0	4
295	61	2	136	70	1	90	183	1.83	26.8745	3	0	0	1	2	CKD	1	T2DM, HTN, RETINOPATHY	3	2	0	0	0	0	0	0	0	0	0	0	0	0	0	0	0	1	0	1	1	1	0	0	0	1	0	1	0	0	0	5
296	72	2	175	70	1	74	155	1.55	30.8012	4	0	0	1	2	CKD	1	T2DM, HTN, D RETINOPATHY	3	2	0	0	0	1	0	1	0	1	1	0	0	0	0	0	0	0	0	1	1	1	0	0	1	0	0	0	0	0	0	7
297	23	1	149	85	1	72	170	1.7	24.9135	3	0	0	1	2	CKD	0	HTN, PEDAL EDEMA	2	0	0	0	0	0	0	0	0	0	0	0	0	0	0	0	0	0	0	1	1	1	0	0	0	0	0	0	0	1	0	4
298	64	2	160	90	1	69	173	1.73	23.0545	2	1	1	1	2	CKD	1	T2DM, HTN	2	1	0	0	0	0	0	1	0	1	0	0	0	1	1	1	0	1	1	1	1	1	0	1	1	0	0	0	0	0	0	9
299	54	1	133	74	0	70	154	1.54	29.5159	3	1	0	0	2	CKD	0	HTN	1	0	0	0	0	0	0	1	0	1	0	0	0	0	0	0	0	0	0	1	1	1	0	0	0	0	0	0	0	0	0	4
300	65	2	145	82	1	72	165	1.65	26.4463	3	0	0	1	3	CKD	0	HTN, HCV	2	0	0	0	0	0	0	1	0	1	0	0	0	0	0	0	0	0	1	1	1	1	0	0	0	0	0	0	0	0	0	5
301	60	2	164	86	0	49	162	1.62	18.6709	2	1	0	0	2	CKD	0	HTN	1	0	0	0	0	0	0	1	0	1	0	0	0	0	0	0	0	0	1	0	1	1	0	0	0	0	0	0	0	0	0	4
302	59	1	190	104	0	53	157	1.57	21.5019	2	1	0	0	2	CKD	1	T2DM, HTN	2	1	0	1	1	0	0	1	0	1	1	1	0	0	0	1	0	1	0	1	1	1	0	0	0	0	0	0	0	0	0	8
303	80	2	135	91	0	49	158	1.58	19.6282	2	0	0	0	3	CKD	0	HTN	1	0	1	0	1	0	0	1	0	1	0	0	0	0	0	0	1	1	0	1	1	1	0	0	0	0	0	0	0	0	0	7
304	47	1	163	108	0	60	152	1.52	25.9695	3	0	0	0	2	CKD	1	T2DM, HTN, HEP C	3	1	0	0	0	0	0	0	0	0	1	0	0	0	0	0	0	1	0	1	1	1	0	0	0	0	0	0	0	0	0	5
305	83	2	184	104	1	79	183	1.83	23.5898	2	1	1	1	2	CKD	0	HTN	1	0	0	0	0	0	0	1	0	1	0	0	0	0	0	0	0	0	0	1	1	1	0	0	0	0	0	0	0	0	0	4
306	66	2	178	56	1	91	165	1.65	33.4251	4	1	0	1	2	CKD	1	DM, HTN, DIABETIC NEPHROPATHY	4	2	1	0	1	0	0	0	0	0	1	0	0	0	0	0	0	1	1	1	1	1	0	1	0	0	0	0	0	0	0	8
307	71	2	206	121	1	70	167	1.67	25.0995	3	0	0	1	2	CKD	1	T2DM, HTN	2	1	1	0	1	0	0	0	0	0	1	0	0	1	0	1	0	0	1	1	1	1	0	0	0	0	0	0	0	0	0	7
308	59	1	182	107	0	62	157	1.57	25.1531	3	1	0	0	3	CKD	0	HTN, SLE	2	0	0	0	0	1	0	0	0	0	0	0	0	0	0	0	0	0	0	1	1	1	0	0	0	0	0	0	0	1	0	5
309	78	2	120	70	1	82	180	1.8	25.3086	3	0	0	1	2	CKD	1	DM, HTN	2	1	0	0	0	0	1	1	0	1	0	0	0	0	0	0	0	0	0	0	1	1	0	0	0	0	0	0	0	0	0	4
310	53	1	161	96	0	67	160	1.6	26.1718	3	1	0	0	3	CKD	1	T2DM, HTN	2	1	0	0	0	0	0	1	0	1	0	0	0	0	0	0	0	1	0	1	1	1	0	0	0	0	0	0	0	0	0	5
311	49	1	171	103	0	75	162	1.62	28.5779	3	1	0	0	2	CKD	0	HTN, HT, RENAL CALCULI	3	0	0	0	0	0	0	1	0	1	0	0	0	0	0	0	0	0	1	0	0	1	0	0	0	0	0	0	0	0	1	4
312	46	1	127	92	0	48	162	1.62	18.2899	1	1	0	0	3	CKD	0	HTN	1	0	0	0	0	0	0	1	0	1	0	0	0	0	0	0	0	1	1	1	1	0	0	0	0	0	0	0	0	0	0	5
313	71	2	145	95	0	76	167	1.67	27.2509	1	1	0	0	2	CKD	0	HTN	1	0	0	0	0	0	0	1	0	1	0	0	0	0	0	0	0	1	0	0	1	1	0	0	0	0	0	0	0	0	0	4
314	46	1	161	88	1	74	172	1.72	25.0135	3	1	0	1	3	CKD	1	T2DM, HTN	2	0	0	0	0	0	0	1	0	1	1	0	0	0	0	0	0	0	0	1	1	1	0	0	0	0	0	0	1	0	0	6
315	60	2	163	82	1	92	183	1.83	27.4717	3	0	1	0	2	CKD	1	T2DM, HTN, D RETINOPATHY	3	2	0	0	0	0	0	0	0	0	0	0	0	0	0	0	0	0	0	1	1	1	0	0	0	1	0	1	0	0	0	4
316	61	2	166	94	1	75	173	1.73	25.0593	3	0	1	1	2	CKD	1	T2DM, HTN	2	1	0	0	0	0	1	1	0	1	0	0	0	0	0	0	0	0	0	0	1	1	0	0	0	0	0	0	0	0	0	4
317	53	1	208	94	1	73	170	1.7	25.2595	3	0	1	1	3	CKD	1	T2DM HTN	2	1	0	0	0	0	0	0	0	0	0	0	0	0	0	0	0	0	1	1	1	1	0	0	0	0	0	0	0	0	0	4
318	42	1	135	93	0	58	151	1.51	25.4375	3	0	0	0	3	CKD	0	HTN, AKI, HT	3	0	0	0	0	0	1	0	0	0	0	0	0	0	0	0	0	0	1	1	0	1	0	0	0	0	0	0	1	0	1	6
319	63	2	173	110	1	72	162	1.62	27.4348	3	1	1	1	2	CKD	0	HTN	1	0	0	0	0	0	0	1	0	1	0	0	0	0	0	0	0	0	1	1	1	1	0	0	0	0	0	0	0	0	0	5
320	51	1	145	86	1	81	178	1.78	25.5649	3	1	0	1	2	CKD	1	T2DM, HTN	2	1	0	0	0	0	1	1	0	1	0	0	0	0	0	0	0	0	1	1	1	1	0	0	0	0	0	0	0	0	0	6
321	56	1	157	99	0	46	155	1.55	19.1467	2	0	0	0	3	CKD	0	HTN, HT	2	0	0	0	0	0	0	1	0	1	0	0	0	0	0	0	0	1	1	1	1	1	0	0	0	0	0	0	0	0	1	7
322	22	1	170	89	1	61	173	1.73	20.3815	2	0	0	0	2	CKD	0	HTN, D RETINOPATHY	2	0	0	0	0	0	1	1	0	1	0	0	0	0	0	0	0	0	1	0	0	1	0	0	0	0	0	0	0	0	0	4
323	59	1	190	106	0	85	153	1.53	36.3108	4	0	0	0	2	CKD	1	DM, HTN, HT	3	1	1	0	1	0	0	0	0	0	0	0	0	0	0	0	0	0	0	1	1	1	0	1	0	0	0	0	0	0	1	6
324	61	2	159	103	0	57	150	1.5	25.3333	3	0	0	0	3	CKD	1	T2DM, HTN, D NEPHROPATHY	3	2	1	0	1	0	0	0	0	0	0	0	1	0	1	1	0	0	0	1	1	1	0	0	0	0	0	0	0	0	0	5
325	53	1	174	96	1	69	162	1.62	26.2917	3	0	0	1	2	CKD	1	DM, HTN	2	1	0	0	0	1	0	0	1	1	1	1	0	0	0	1	0	1	0	0	0	1	0	1	0	0	0	0	0	0	0	7
326	48	1	127	82	1	70	165	1.65	25.7116	3	1	1	1	2	CKD	1	T2DM, HTN, DIABETIC FOOT	3	2	0	0	0	0	0	0	0	0	0	0	0	1	0	1	0	1	0	0	1	1	0	1	0	0	0	0	0	0	0	5
327	40	1	155	95	0	42	155	1.55	17.4818	1	1	0	0	2	CKD	1	DM, HTN	2	1	0	0	0	0	0	1	0	1	0	0	0	0	0	0	0	1	0	1	1	1	0	1	0	0	0	0	0	0	0	6
328	43	1	170	100	1	70	162	1.62	26.6727	3	0	0	0	3	CKD	0	HTN	1	0	0	0	0	1	0	1	0	1	0	0	0	0	0	0	1	0	0	0	1	0	0	0	0	0	0	0	0	1	0	5
329	65	2	190	96	1	67	175	1.75	21.8775	2	0	0	1	2	CKD	1	T2DM, HTN, RETINOPATHY	3	2	0	0	0	0	0	1	0	1	0	0	0	1	0	1	0	1	1	1	1	1	0	0	0	0	0	0	0	0	0	7
330	65	2	176	93	0	66	157	1.57	26.7759	3	1	0	0	2	CKD	0	HTN. CAD	2	0	0	0	0	0	0	1	0	1	0	0	0	0	0	0	0	1	0	1	1	1	0	0	0	0	0	0	0	0	0	5
331	51	1	131	84	0	48	157	1.57	19.4734	2	0	0	0	2	CKD	1	T2DM, HTN, PYELONEPHRITIS	3	1	0	0	0	0	0	1	0	1	0	0	0	0	0	0	0	0	1	0	1	1	0	0	0	0	0	0	0	0	0	4
332	44	1	176	119	1	75	172	1.72	25.3515	3	1	0	1	2	CKD	0	HTN, ADPKD	2	0	0	0	0	0	0	0	0	0	0	0	0	0	0	0	0	1	0	0	1	1	0	0	0	0	0	0	1	0	0	4
333	72	2	140	80	1	71	167	1.67	25.458	3	0	0	1	2	CKD	0	HTN	1	0	0	0	0	0	0	1	0	1	0	0	0	0	0	0	0	0	0	0	1	1	0	0	0	0	0	0	0	0	0	3
334	32	1	213	110	1	66	160	1.6	25.7812	3	0	0	1	3	CKD	0	HTN, ANEMIA	2	0	0	0	0	0	1	1	0	1	0	0	0	0	0	0	0	1	1	1	0	0	0	0	0	0	0	0	1	0	0	6
335	38	1	171	108	1	70	167	1.67	25.0995	3	0	0	1	3	CKD	0	HTN	1	0	0	0	0	1	1	0	0	0	0	0	0	0	0	0	0	0	0	1	1	1	0	0	1	0	0	0	0	0	0	6
336	56	1	168	96	1	72	183	1.83	21.4996	2	1	0	1	2	CKD	1	T2DM, HTN	2	1	0	0	0	0	0	1	0	1	1	0	0	0	0	0	0	1	1	1	1	0	0	0	0	0	0	0	0	0	0	6
337	72	2	128	91	1	60	152	1.52	25.9695	2	0	0	1	2	CKD	0	HTN, NEPHROTIC SYNDROME	2	0	0	0	0	0	0	1	0	1	0	0	0	0	0	0	0	0	1	1	1	0	0	0	0	0	0	0	0	0	0	4
338	70	2	180	101	1	43	157	1.57	17.4449	1	0	0	0	2	CKD	1	HTN, DIABETIC RETINOPATHY	2	2	1	0	1	0	0	0	0	0	0	0	0	0	0	0	0	0	0	1	1	1	0	0	0	0	0	0	0	0	0	4
339	61	2	196	113	1	50	165	1.65	18.3655	2	0	1	1	3	CKD	1	DM, HTN	2	1	0	0	0	0	0	1	0	1	1	0	0	0	0	0	0	0	1	1	1	0	0	0	0	0	0	0	0	0	0	5
340	36	1	140	94	1	63	165	1.65	23.1405	2	0	0	0	2	CKD	0	HTN, ADPKD	2	0	1	0	1	0	0	0	0	0	0	0	0	0	0	0	0	0	0	0	1	1	0	0	0	0	0	0	0	0	0	3
341	22	1	177	117	1	60	168	1.68	21.2585	2	1	0	0	3	CKD	1	HTN, AKI, D RETINOPATHY	4	2	0	0	0	0	0	1	0	1	0	0	0	0	0	0	0	0	0	1	1	1	0	0	0	0	0	0	1	0	0	5
342	61	2	151	83	1	82	170	1.7	28.3737	3	1	0	1	2	CKD	1	T2DM, HTN, AKI	3	1	0	0	0	0	0	1	0	1	0	0	0	0	0	0	0	1	1	1	1	0	0	1	1	0	0	0	0	0	0	7
343	61	2	133	88	1	43	163	1.63	16.1843	1	1	0	0	3	CKD	0	HTN, ADENO CARCINOMA, AKI	3	0	0	0	0	0	0	0	0	0	0	0	0	0	0	0	1	1	1	0	1	0	0	1	0	0	0	0	0	1	1	7
344	46	1	228	126	1	51	167	1.67	18.2868	1	1	0	1	3	CKD	1	T2DM, HTN, D NEPHROPATHY	3	2	0	0	0	0	0	1	0	1	1	0	0	0	0	0	0	1	1	1	1	0	0	0	0	0	0	0	0	0	0	6
345	45	1	154	82	1	49	165	1.65	17.9981	1	1	0	1	3	CKD	1	T2DM, HTN	2	1	0	0	0	0	1	0	0	0	0	0	0	0	0	0	0	1	0	1	1	0	0	0	0	0	0	0	0	0	0	4
346	22	1	150	100	1	65	175	1.75	21.2245	2	0	0	1	3	CKD	0	HTN	1	0	0	0	0	1	0	0	0	0	0	0	0	0	0	0	0	1	0	0	0	0	0	0	0	0	0	0	0	0	0	2
347	40	1	164	95	0	40	152	1.52	17.313	1	0	0	0	2	CKD	0	HTN, AKI	2	0	0	0	0	0	0	0	0	0	0	0	0	0	0	0	0	1	1	1	1	1	0	0	0	0	0	0	0	0	0	5
348	50	1	165	101	1	45	167	1.67	16.1354	1	1	1	1	3	CKD	0	HTN, AKI, UTI	3	0	0	0	0	0	0	0	0	0	0	0	0	0	0	0	0	0	1	1	1	1	0	0	0	0	0	0	0	0	0	4
349	60	2	150	98	0	62	150	1.5	27.5555	3	1	0	0	2	CKD	1	HTN, DM	2	1	1	0	1	0	0	0	0	0	0	0	0	0	0	0	1	1	0	1	1	0	0	0	0	0	0	0	0	0	0	5
350	60	2	160	95	1	80	175	1.75	26.1224	3	0	0	1	2	CKD	0	HTN, AKI	2	0	0	0	0	0	0	1	0	1	0	0	0	0	0	0	1	1	0	0	0	0	0	1	0	0	0	0	0	0	0	4
351	40	1	208	154	1	59	153	1.53	25.204	3	1	1	1	3	CKD	0	HTN	1	0	1	0	1	0	1	0	0	0	0	0	0	0	0	0	0	1	0	0	0	0	0	0	0	0	0	0	0	0	0	3
352	45	1	145	92	0	62	155	1.55	25.8064	3	0	0	0	3	CKD	1	T2DM, AKI, PYELONEPHRITIS	3	1	0	0	0	0	0	0	0	0	1	0	0	0	0	0	0	0	1	1	1	1	0	0	0	0	0	0	0	0	0	5
353	33	1	124	80	0	45	157	1.57	18.2563	1	0	0	0	3	CKD	0	HTN	1	0	0	0	0	0	0	1	0	1	0	0	0	0	0	0	0	0	0	1	1	1	0	0	0	0	0	0	0	0	0	4
354	75	2	152	80	1	98	180	1.8	30.2469	4	0	0	1	3	CKD	0	HTN, NEPHROLITHIASIS, PYELONEPHRITIS	3	0	0	0	0	0	1	1	0	1	0	0	0	0	0	0	0	1	0	0	0	0	0	0	0	1	0	1	0	0	0	4
355	32	1	157	86	1	74	167	1.67	26.5337	3	1	0	1	3	CKD	0	HTN. NEPHROTIC SYNDROME	2	0	0	0	0	0	0	0	0	0	0	0	0	0	0	0	1	1	0	1	1	0	0	0	0	0	0	0	0	0	0	4
356	63	2	175	84	1	64	157	1.57	25.9645	3	1	0	0	3	CKD	1	T2DM, HTN, CAD	3	1	0	0	0	0	1	0	0	0	0	0	0	0	1	1	0	1	0	1	1	1	0	0	1	0	0	0	0	0	0	7
357	50	1	130	94	1	78	167	1.67	27.968	3	1	0	0	3	CKD	1	HTN, DIABETIC RETINOPATHY, t2dm	3	2	0	0	0	0	0	0	1	1	0	0	1	0	0	1	0	1	1	1	1	0	0	0	1	0	0	0	0	0	0	7
358	44	1	168	92	1	72	169	1.69	25.2092	3	0	0	0	2	CKD	0	HTN, LUPUS NEPHRITIS. HT	3	0	0	0	0	0	0	0	0	0	0	0	0	0	0	0	0	1	0	0	1	0	0	0	0	0	0	0	0	1	1	4
359	30	1	150	94	1	52	177	1.77	16.598	1	1	0	0	2	CKD	0	HTN	1	0	0	0	0	0	0	0	1	1	0	0	0	0	0	0	0	1	1	0	1	0	0	0	0	0	0	0	1	0	0	5
360	58	1	146	82	0	105	165	1.65	38.5675	4	0	0	0	3	CKD	1	T2DM, HTN	1	1	1	0	1	0	0	0	0	0	0	0	0	0	0	0	0	1	0	1	1	1	0	0	1	0	0	0	0	0	0	6
361	28	1	141	81	0	46	165	1.65	16.8962	1	0	0	0	2	CKD	0	HTN, NEPHRITIS	2	0	0	0	0	0	0	1	0	1	0	0	0	0	0	0	0	0	0	0	1	0	0	0	0	0	0	0	0	1	0	3
362	47	1	185	109	0	55	165	1.65	20.202	2	0	0	0	2	CKD	0	HTN	1	0	0	0	0	0	0	1	0	1	0	0	0	0	0	0	0	1	0	1	1	1	0	0	0	0	0	0	0	0	0	5
363	58	1	189	99	0	92	167	1.67	32.9879	4	0	0	0	2	CKD	0	HTN, NEPHROTIC SYNDROME	2	0	1	0	1	0	0	0	0	0	0	0	0	0	0	0	0	0	0	0	1	0	0	0	0	0	0	0	0	0	0	2
364	58	1	141	103	1	65	161	1.61	25.0762	4	0	1	1	2	CKD	0	HTN, CAD	2	0	0	0	0	1	0	0	0	0	0	0	0	0	0	0	0	1	0	0	0	0	0	1	0	0	0	0	0	0	0	3
365	60	2	180	95	1	65	157	1.57	26.3702	3	1	0	1	2	CKD	1	T2DM, HTN, AKI	3	1	0	0	0	0	0	1	0	1	1	0	0	0	0	0	0	1	0	1	1	1	0	0	0	0	0	0	0	0	0	6
366	65	2	143	92	1	79	172	1.72	26.7036	3	0	1	1	3	CKD	1	T2DM, HTN, AKI, COPD, D NEPHROPATHY	4	2	0	0	0	0	0	1	0	1	0	0	0	0	0	0	0	0	1	1	1	1	0	0	0	0	0	0	0	0	0	5
367	32	1	158	109	1	46	167	1.67	16.4939	1	0	0	0	3	CKD	0	HTN, AKI	2	0	0	0	0	0	1	1	0	1	0	0	0	0	0	0	0	1	1	1	1	1	0	0	0	0	0	0	0	0	0	7
368	38	1	137	90	0	62	152	1.52	26.8352	3	0	0	0	2	CKD	0	HTN	1	0	0	0	0	0	0	0	0	0	0	0	0	0	0	0	0	1	1	1	1	1	0	0	0	0	0	0	0	0	0	5
369	32	1	119	94	0	65	152	1.52	28.1336	3	1	0	0	2	CKD	0	HTN	1	0	0	0	0	0	0	1	0	1	0	0	0	0	0	0	0	0	0	1	1	1	0	0	0	0	0	0	0	0	0	4
370	47	1	140	98	1	75	167	1.67	26.8923	3	0	0	1	3	CKD	1	T2DM, HTN	2	1	0	0	0	0	0	1	0	1	0	0	0	0	0	0	0	0	0	0	1	1	0	0	0	0	0	0	0	0	0	3
371	70	2	151	102	1	86	185	1.85	25.1278	3	1	0	1	2	CKD	0	HTN	1	0	0	0	0	0	0	1	0	1	0	0	0	0	0	0	0	0	1	1	1	0	0	0	0	0	0	0	0	0	0	4
372	65	2	133	85	1	69	165	1.65	25.3443	3	0	1	1	3	CKD	0	HTN	1	0	0	0	0	0	0	1	0	1	0	0	0	0	0	0	0	0	0	1	1	1	0	0	0	0	0	0	0	0	0	4
373	50	1	190	110	1	62	175	1.75	20.2449	2	1	1	1	3	CKD	1	DM, HTN	2	1	0	0	0	1	0	0	0	0	1	0	0	0	0	0	0	1	0	1	1	0	0	1	0	0	0	0	0	0	0	6
374	32	1	148	93	1	55	158	1.58	22.0317	2	0	0	1	3	CKD	0	HTN	1	0	0	0	0	0	0	1	0	1	0	0	0	0	0	0	0	0	0	1	1	1	0	0	0	0	0	0	0	0	0	4
375	35	1	110	70	1	35	157	1.57	14.1993	1	1	0	0	3	CKD	0	HTN	1	0	0	0	0	0	0	0	0	0	0	0	0	0	0	0	0	0	0	1	1	1	0	0	0	0	0	0	0	0	0	3
376	28	1	135	106	0	70	162	1.62	26.6727	3	1	0	0	3	CKD	0	HTN	1	0	0	0	0	0	0	1	0	1	0	0	0	0	0	0	0	0	0	1	1	1	0	0	0	0	0	0	0	0	0	4
377	34	1	186	121	1	85	182	1.82	25.6611	3	0	0	1	2	CKD	0	HTN, AKI	2	0	1	0	1	0	0	1	0	1	0	0	0	0	0	0	0	1	1	0	0	1	0	0	0	0	0	0	0	0	0	5
378	25	1	110	72	0	55	157	1.57	22.3133	2	1	0	0	2	CKD	0	HTN, LUPUS NEPHRITIS	2	0	0	0	0	0	0	1	0	1	0	0	0	0	0	0	0	1	0	0	1	0	0	0	0	0	0	0	0	1	0	4
379	52	1	140	85	1	62	157	1.57	25.1531	3	1	0	1	3	CKD	1	T2DM., HTN, HT, NEUROPATHY	4	1	0	0	0	0	0	0	0	0	0	0	0	0	0	0	0	1	0	1	1	1	0	0	0	0	0	0	0	0	1	5
380	41	1	157	96	1	74	167	1.67	26.5337	3	1	1	1	2	CKD	0	HTN,. NEPHROTIC SYNDROME, IG NEPHROPATHY	3	0	0	0	0	1	0	0	0	0	0	0	0	0	0	0	1	0	0	0	1	1	0	0	0	1	0	1	0	0	0	5
381	32	1	116	69	1	95	178	1.78	29.9836	4	0	1	1	3	CKD	0	HTN, NEPHROTIC SYNDROME	2	0	0	0	0	1	0	0	0	0	0	0	0	0	0	0	1	0	0	0	0	0	0	0	0	0	0	0	0	0	0	2
382	52	1	152	90	1	84	177	1.77	26.8122	3	0	0	1	2	CKD	0	HTN	1	0	0	0	0	0	0	1	0	1	0	0	0	0	0	0	0	1	0	1	1	1	0	0	0	0	0	0	0	0	0	5
383	68	2	170	77	0	73	166	1.66	26.4915	3	1	0	0	2	CKD	1	DM, HTN, CAD, HT	4	1	1	0	1	0	0	0	0	0	0	1	0	0	0	1	0	0	0	0	1	0	0	1	1	0	0	0	0	0	1	6
384	43	1	106	73	1	68	168	1.68	24.0929	2	0	1	0	2	CKD	0	HTN, BENIGN NEPHROSECLEROSIS, RETINOPATHY, NS	4	0	1	0	1	0	0	1	0	1	0	0	0	0	0	0	0	0	0	1	1	1	0	0	0	0	0	0	0	0	0	5
385	40	1	163	103	1	85	175	1.75	27.7551	3	0	0	1	3	CKD	0	HTN, AKI	2	0	0	0	0	0	1	1	0	1	0	0	0	0	0	0	0	0	0	1	1	1	0	0	0	1	0	1	0	0	0	6
386	42	1	134	86	0	70	162	1.62	26.6727	3	0	0	0	2	CKD	0	HTN, SLE	2	0	0	0	0	1	0	0	0	0	0	0	0	0	0	0	1	0	0	0	1	1	0	0	0	0	0	0	0	1	0	5
387	26	1	145	90	0	62	157	1.57	25.1531	3	1	0	0	2	CKD	0	HTN	1	0	1	0	1	0	0	0	0	0	0	0	0	0	0	0	0	0	0	1	1	1	0	0	0	0	0	0	0	0	0	4
388	58	1	189	105	1	55	170	1.7	19.0311	2	0	0	0	3	CKD	1	T2DM, HTN	2	1	0	0	0	0	0	1	0	1	1	0	0	1	1	1	0	1	0	1	1	1	0	1	0	0	0	0	0	1	0	9
389	60	2	118	82	0	60	165	1.65	22.0385	2	0	0	0	3	CKD	0	HTN	1	0	1	0	1	0	0	1	0	1	0	0	0	0	0	0	0	0	0	0	1	1	0	0	0	0	0	0	0	0	0	4
390	57	1	134	68	1	62	157	1.57	25.1531	3	1	0	1	3	CKD	1	T2DM, HTN	2	1	0	0	0	0	0	1	0	1	0	0	1	0	0	1	0	1	0	0	1	1	0	0	0	0	0	0	0	0	0	5
391	55	1	200	101	0	72	157	1.57	29.2101	3	1	0	0	2	CKD	1	DM, HTN	2	1	0	0	0	0	0	0	0	0	0	0	0	1	0	1	0	1	0	1	1	1	0	0	0	0	0	0	0	0	1	6
392	66	2	147	92	1	71	160	1.6	27.7343	3	1	0	1	2	CKD	1	T2DM , HTN	2	1	1	0	1	0	0	1	0	1	0	0	1	0	0	1	1	0	1	1	1	1	0	0	0	0	0	0	0	0	0	8
393	45	1	133	82	0	62	152	1.52	26.8352	3	1	0	0	2	CKD	0	HTN, AKI	2	0	0	0	0	0	0	0	0	0	0	0	0	0	0	0	0	1	1	0	1	0	0	0	1	0	0	0	0	0	0	4
394	42	1	140	70	1	66	173	1.73	22.0522	2	0	1	1	2	CKD	0	HTN	1	0	0	0	0	0	0	1	0	1	0	0	0	0	0	0	0	0	0	0	1	0	0	0	0	0	0	0	0	0	0	2
395	42	1	153	98	0	87	165	1.65	31.9559	4	1	0	0	2	CKD	1	T2DM, HTN	2	1	0	0	0	0	0	1	0	1	1	0	0	0	0	0	0	1	1	0	1	1	0	0	0	0	0	0	0	0	0	6
396	45	1	135	87	0	70	155	1.55	29.1363	3	0	0	0	2	CKD	0	HTN	1	0	1	0	1	0	0	0	0	0	0	0	0	0	0	0	0	0	0	1	1	1	0	0	0	0	0	0	0	0	0	4
397	48	1	136	80	1	70	175	1.75	22.8571	2	0	0	1	2	CKD	1	T2DM, HTN	2	1	0	0	0	0	0	0	0	0	0	0	0	1	0	1	0	1	1	1	1	1	0	0	0	0	0	0	0	0	0	6
398	36	1	100	69	0	48	163	1.63	18.0661	1	1	0	0	2	CKD	0	HTN, HT, NEPHROTIC SYNDROME	3	0	0	0	0	1	0	0	0	0	0	0	0	0	0	0	1	0	0	0	1	0	0	0	0	0	0	0	0	1	1	5
399	81	2	126	50	1	42	177	1.77	13.4061	1	1	0	0	2	CKD	0	HTN	1	0	0	0	0	0	0	1	0	1	0	0	0	0	0	0	0	1	1	1	1	1	0	0	0	0	0	0	0	0	0	6
400	62	2	151	75	1	47	160	1.6	18.3594	1	1	0	0	2	CKD	1	T2DM, HTN	2	1	0	0	0	0	0	0	0	0	0	0	0	0	1	1	0	0	0	1	0	1	0	0	0	0	0	0	1	0	0	4
401	74	2	136	82	0	50	160	1.6	19.5312	2	0	0	0	3	CKD	0	HTN	1	0	0	0	0	0	0	1	0	1	0	0	0	0	0	0	0	1	0	0	0	0	0	0	0	1	0	1	0	0	0	3
402	60	2	154	94	0	65	157	1.57	26.3702	3	0	0	0	2	CKD	0	HTN	1	0	1	0	1	0	0	0	1	1	0	0	0	0	0	0	0	1	0	1	1	1	0	1	1	0	0	0	0	0	0	8
403	65	2	149	87	1	44	165	1.65	16.1616	1	0	1	1	3	CKD	1	T2DM, HTN, AKI, COPD, D NEPHROPATHY	4	1	0	0	0	0	0	1	0	1	1	0	0	0	0	0	0	0	0	1	1	1	0	1	0	0	0	0	0	0	0	6
404	55	1	103	75	0	75	149	1.49	33.7822	4	1	0	0	3	CKD	1	T2DM, HTN, NEPHROLITHIASIS	3	1	0	0	0	0	0	0	0	0	1	0	0	0	0	0	0	1	0	1	1	1	0	1	0	0	0	0	0	0	1	7
405	52	1	164	91	1	47	162	1.62	17.9088	1	1	1	0	2	CKD	0	HTN, CAD, AKI	3	1	1	0	1	0	1	0	1	1	0	0	0	0	0	0	0	0	0	0	0	0	0	0	0	0	0	0	0	0	0	3
406	77	2	148	84	1	76	170	1.7	26.2975	3	1	0	1	2	CKD	0	HTN	1	0	0	0	0	0	0	1	0	1	0	0	0	0	0	0	0	0	1	1	1	1	0	0	0	0	0	0	0	0	0	5
407	70	2	133	63	0	42	145	1.45	19.9762	2	1	0	0	2	CKD	0	HTN, ANEMIA	2	0	0	0	0	0	0	0	0	0	0	0	0	0	0	0	0	0	0	1	0	1	0	0	0	0	0	0	1	0	0	3
408	66	2	125	76	1	70	165	1.65	25.7116	3	1	0	1	2	CKD	1	T2DM, HTN, CAD	3	1	0	0	0	0	0	0	0	0	0	0	1	0	0	1	1	0	0	1	1	1	0	0	0	0	0	0	0	0	0	5
409	25	1	140	80	1	45	157	1.57	18.2563	1	1	1	1	3	CKD	0	HTN	1	0	0	0	0	0	0	1	0	1	0	0	0	0	0	0	0	1	0	1	0	1	0	0	0	0	0	0	0	0	0	4
410	58	1	147	77	0	40	155	1.55	16.6493	1	0	0	0	3	CKD	1	T2DM, HTN, ANEMIA	3	1	1	0	1	0	0	0	0	0	1	0	0	0	0	0	0	0	0	1	1	1	0	0	0	0	0	0	0	0	0	5
411	64	2	140	105	1	65	155	1.55	27.0551	3	0	1	1	3	CKD	0	HTN	1	0	0	0	0	0	0	1	0	1	0	0	0	0	0	0	0	0	0	0	1	1	0	0	1	0	0	0	0	0	0	4
412	62	2	140	77	1	76	174	1.74	25.1024	3	1	0	1	2	CKD	1	T2DM, HTN, HT	3	1	1	0	1	0	0	0	0	0	1	0	0	0	0	0	0	1	0	1	1	0	0	0	0	0	0	0	0	0	0	5
413	33	1	140	96	0	61	152	1.52	26.4023	3	0	0	0	3	CKD	0	HTN, NEPHROTIC SYNDROME	2	0	0	0	0	1	0	1	0	1	0	0	0	0	0	0	0	0	0	1	1	0	0	0	0	0	0	0	0	0	0	4
414	28	1	164	85	1	68	165	1.65	24.977	3	1	0	0	2	CKD	0	HTN	1	0	0	0	0	0	0	1	1	1	0	0	0	0	0	0	0	0	0	0	0	1	0	0	0	0	0	0	0	0	0	2
415	51	1	186	107	0	40	157	1.57	16.2278	1	0	0	0	3	CKD	1	T2DM, HTN, ANEMIA	3	1	0	0	0	0	0	0	0	0	0	0	1	0	0	1	1	1	1	1	1	1	0	0	0	0	0	0	0	0	0	7
416	30	1	124	85	0	56	157	1.57	22.7189	2	1	0	0	3	CKD	0	HTN	1	0	1	0	1	0	1	1	0	1	0	0	0	0	0	0	0	1	0	1	1	1	0	0	0	0	0	0	1	0	0	8
417	65	2	127	87	1	70	167	1.67	25.0995	3	0	1	1	3	CKD	0	HTN, HCV	2	0	0	0	0	0	0	1	0	1	0	0	0	0	0	0	0	1	1	1	1	1	0	1	0	0	0	0	0	0	0	7
418	82	2	167	76	1	80	173	1.73	26.7299	3	1	0	1	2	CKD	1	T2DM, HTN	2	1	0	0	0	0	0	0	0	0	1	0	0	0	0	0	0	1	0	1	1	1	0	0	1	0	0	0	0	0	0	6
419	43	1	125	86	1	128	180	1.8	39.5061	4	1	0	1	2	CKD	0	HTN, IGA NEPHROPATHY	2	0	0	0	0	1	1	0	0	0	0	0	0	0	0	0	0	0	0	0	1	1	0	0	0	1	0	1	0	0	0	5
420	55	1	166	81	0	59	151	1.51	25.876	3	1	0	0	2	CKD	1	T2DM, HTN, DIABETIC NEPHROPATHY	3	2	0	0	0	0	1	1	0	1	0	1	0	0	0	1	0	1	1	1	0	0	0	0	0	0	0	0	0	0	0	6
421	40	1	160	120	1	45	157	1.57	18.2563	1	0	0	1	3	CKD	0	HTN, CLD, HEP C	3	2	0	0	0	0	1	0	0	0	0	0	0	0	0	0	0	1	0	1	1	1	0	0	0	0	0	0	0	0	0	5
422	51	1	149	103	0	69	165	1.65	25.3443	3	0	0	0	3	CKD	1	DM, HTN	2	1	0	0	0	0	0	1	0	1	0	0	0	0	1	1	0	1	0	1	1	1	0	0	0	0	0	0	0	0	0	6
423	52	1	130	93	0	75	155	1.55	31.2174	4	1	0	0	2	CKD	0	htn	1	0	1	0	1	0	0	0	0	0	0	0	0	0	0	0	1	0	0	0	1	0	0	1	0	0	0	0	0	0	0	4
424	74	2	168	82	1	78	175	1.75	25.4694	3	1	0	1	3	CKD	1	T2DM, HTN	2	1	1	0	1	0	1	0	0	0	0	0	0	1	0	1	0	1	0	1	1	1	0	1	0	0	0	0	0	0	0	8
425	52	1	158	94	1	65	175	1.75	21.2245	2	0	0	0	3	CKD	1	T2DM, HTN, DN, DR	4	2	0	0	0	0	0	1	0	1	0	1	1	1	0	1	0	1	0	1	1	1	0	0	0	0	0	0	0	0	0	6
426	56	1	168	96	0	67	152	1.52	28.9993	3	1	0	0	2	CKD	1	T2DM, HTN	2	1	0	0	0	0	0	1	0	1	0	1	0	1	0	1	0	0	1	1	1	1	0	0	0	0	0	0	0	0	0	6
427	58	1	155	88	0	66	162	1.62	25.1486	3	0	0	0	2	CKD	1	T2DM, HTN, ANEMIA	3	1	0	0	0	0	0	1	0	1	1	0	0	0	1	1	0	1	0	1	1	0	0	0	0	0	0	0	0	0	0	6
428	60	2	120	85	0	45	160	1.6	17.5781	1	0	0	0	2	CKD	1	T2DM, HTN, AKI, DN	4	2	0	0	0	0	0	1	0	1	1	0	0	0	0	0	0	1	0	1	1	1	0	0	0	0	0	0	0	0	0	6
429	53.7	1	150	103	1	94	170	1.7	32.5259	4	1	0	0	3	CKD	0	HTN	1	0	0	0	0	0	0	1	0	1	0	0	0	0	0	0	0	0	0	1	1	0	0	0	0	0	0	0	0	0	0	3
430	47	1	147	80	0	55	168	1.68	19.4869	2	1	0	0	2	CKD	1	T2DM, HTN	2	1	0	0	0	1	0	1	0	1	1	0	0	0	0	0	0	1	0	1	0	0	0	0	0	0	0	0	0	0	0	5
431	42	1	122	88	1	75	170	1.7	25.9515	3	0	0	0	3	CKD	1	T2DM, HTN, AKI	3	1	0	0	0	0	0	1	0	1	1	0	0	0	0	0	0	1	1	1	0	1	0	0	0	0	0	0	0	0	0	6
432	44	1	136	89	0	64	173	1.73	21.3839	2	1	0	0	2	CKD	0	HTN	1	0	1	0	1	0	0	0	0	0	0	0	0	0	0	0	0	1	0	1	1	1	0	0	0	0	0	0	0	1	0	6
433	66	2	170	70	1	78	175	1.75	25.4694	3	0	0	0	3	CKD	1	T2DM, HTN, ANEMIA, DIABETIC FOOT	4	2	0	0	0	0	0	1	0	1	0	0	0	0	0	0	0	1	1	1	1	1	0	0	0	0	0	0	0	0	0	6
434	39	1	130	88	1	75	168	1.68	26.5731	3	1	0	1	3	CKD	1	T2DM, HTN, HT	3	1	1	0	1	0	0	0	0	0	0	0	0	1	0	1	1	0	0	1	1	1	0	0	0	0	0	0	0	0	1	7
435	68	2	169	99	1	75	168	1.68	26.5731	3	1	1	1	2	CKD	1	T2DM, HTN	2	1	0	0	0	0	0	1	0	1	0	0	0	0	0	0	0	1	0	0	0	0	0	1	0	0	0	0	0	0	0	3
436	57	1	138	95	0	65	163	1.63	24.4646	2	1	0	0	2	CKD	0	HTN, NEPHROTIC SYNDROME	2	0	1	0	1	0	0	0	0	0	0	0	0	0	0	0	1	0	0	0	1	1	0	0	0	0	0	0	0	0	0	4
437	42	1	116	90	0	51	163	1.63	19.1953	2	0	0	0	3	CKD	0	HTN	1	0	1	0	1	0	0	0	0	0	0	0	0	0	0	0	0	1	0	1	1	1	0	0	0	0	0	0	0	0	0	5
438	27	1	121	90	0	63	162	1.62	24.0055	2	0	0	0	2	CKD	0	HTN, LUPUS NEPHRITIS	2	0	0	0	0	1	0	0	0	0	0	0	0	0	0	0	0	0	0	0	1	0	0	0	0	0	0	0	0	1	0	3
439	60	2	151	113	0	72	163	1.63	27.0992	3	0	0	0	1	CKD	0	HTN	1	0	1	0	1	0	0	1	0	1	0	0	0	0	0	0	0	1	0	0	0	1	0	0	0	0	0	0	0	0	0	4
440	47	1	140	93	0	48	153	1.53	20.5049	2	1	0	0	3	CKD	0	HTN	1	0	0	0	0	0	0	0	0	0	0	0	0	0	0	0	0	0	0	0	1	1	0	0	0	0	0	0	0	0	0	2
441	64	2	148	87	1	65	157	1.57	26.3702	3	0	1	0	3	CKD	0	HTN	1	0	0	0	0	0	0	1	0	1	0	0	0	0	0	0	0	0	0	1	1	0	0	0	0	0	0	0	0	0	0	3
442	35	1	164	85	1	76	170	1.7	26.2975	3	1	1	1	3	CKD	0	HTN	1	0	1	0	1	0	0	0	0	0	0	0	0	0	0	0	0	1	0	0	1	1	0	0	0	0	0	0	0	0	0	4
443	38	1	115	82	1	76	171	1.71	25.9909	3	1	0	0	2	CKD	0	HTN	1	0	0	0	0	0	0	1	0	1	0	0	0	0	0	0	0	1	1	0	1	1	0	0	0	0	0	0	0	0	0	5
444	60	2	132	96	0	67	157	1.57	27.1816	3	1	0	0	2	CKD	0	HTN, HT	2	0	1	0	1	0	0	0	0	0	0	0	0	0	0	0	0	1	0	1	1	0	0	0	0	0	0	0	0	0	1	5
445	71	2	132	70	0	40	160	1.6	15.625	1	1	0	0	3	CKD	1	T2DM, HTN	2	0	0	0	0	0	1	1	0	1	0	0	0	0	0	0	0	1	1	0	1	1	0	0	0	0	0	0	0	0	0	6
446	59	1	127	81	1	55	182	1.82	16.6043	1	0	0	1	2	CKD	0	HTN	1	0	0	0	0	0	1	1	0	1	0	0	0	0	0	0	0	0	0	1	1	1	0	0	0	0	0	0	0	0	0	5
447	54	1	130	86	1	61	173	1.73	20.3815	2	0	1	1	2	CKD	1	T2DM, HTN, AKI	3	1	0	0	0	0	0	1	0	1	1	0	0	0	0	0	0	1	1	1	0	0	0	0	0	0	0	0	0	0	0	5
448	58	1	188	126	0	51	160	1.6	19.9219	2	0	0	0	3	CKD	1	T2DM, HTN, CAD, HT	4	1	1	0	1	0	0	0	0	0	0	0	0	0	0	0	0	10	0	1	0	0	0	1	0	0	0	0	0	0	1	14
449	32	1	103	81	0	42	155	1.55	17.4818	1	0	0	0	2	CKD	0	HTN, HYDRONEPHROSIS	2	0	0	0	0	0	0	1	0	1	0	0	0	0	0	0	0	0	0	0	1	1	0	0	0	0	0	0	0	0	0	3
450	66	2	129	91	1	80	172	1.72	27.0416	3	1	0	1	2	CKD	1	T2DM, HTN	2	1	1	0	1	0	0	0	0	0	1	0	0	0	0	0	0	0	1	0	0	1	0	0	0	0	0	0	0	0	0	4
[truncated: 82 more columns]
